# Supplementary material for: Carbon and nitrogen-based gas fluxes in subarctic ecosystems under climate warming and increased cloudiness
Source: Royal Society of Chemistry journal article supplement (doi:10.1039/d4ea00017j), 2024-01-01
Supplement: d4ea00017j2.pdf [file d4ea00017j2.pdf]

**Electronic Supplementary Information\_2 (ESI\_2)**

**for**

**Carbon and nitrogen-based gas fluxes in subarctic ecosystems under climate  
warming and increased cloudiness**

Flobert A. Ndah\*, Marja Maljanen, Riikka Rinnan, Hem Raj Bhattarai, Cleo L.  
Davie-Martin, Santtu Mikkonen, Anders Michelsen, Minna Kivimäenpää

\*Corresponding author: Flobert A. Ndah, Department of Environmental and  
Biological Sciences, University of Eastern Finland, P.O Box 1627, 70211, Kuopio,  
Finland. Email: [flobert.ndah@uef.fi](mailto:flobert.ndah@uef.fi)

#### Abbreviation of Compound Groups

HC = Hydrocarbons

ISO = Isoprene

MT = Monoterpenes

oMT = Oxygenated monoterpenes

SQT = Sesquiterpenes

oSQT = Oxygenated sesquiterpenes

OVOC = Oxygenated VOCs

Other = Other VOCs

| Emission rates (mean ± S.E., µg m <sup>-2</sup> h <sup>-1</sup> ) of individual compounds from mesocosms from Paba (Pa), Tundra (T1), and tundra (T2) sites under control (C), warming (W), increased cloudiness (FAR), and warming + increased cloudiness (W-FAR) treatments, in mid-June of the first growing season. |        |        |       |       |       |        |       |       |       |       |       |        |        |       |        |        |        |       |
|-------------------------------------------------------------------------------------------------------------------------------------------------------------------------------------------------------------------------------------------------------------------------------------------------------------------------|--------|--------|-------|-------|-------|--------|-------|-------|-------|-------|-------|--------|--------|-------|--------|--------|--------|-------|
| Compounds                                                                                                                                                                                                                                                                                                               | Groups | C      |       |       |       | W      |       |       |       | FAR   |       |        |        | W-FAR |        |        |        |       |
|                                                                                                                                                                                                                                                                                                                         |        | Mean   | S.E.  | T1    | T2    | Mean   | S.E.  | T1    | T2    | Mean  | S.E.  | T1     | T2     | Mean  | S.E.   | T1     | T2     |       |
| Compounds                                                                                                                                                                                                                                                                                                               |        |        |       |       |       |        |       |       |       |       |       |        |        |       |        |        |        |       |
| methyloxycyclopentane                                                                                                                                                                                                                                                                                                   | HC     | 0.148  | 0.084 | 0.040 | 0.129 | 0.083  | 0.036 | 0.218 | 0.039 | 0.031 | 0.203 | 0.063  | 0.919  | 1.980 | 11.02  | 3.097  | 4.009  | 4.320 |
| cyclohexane                                                                                                                                                                                                                                                                                                             | HC     | 0.000  | 0.000 | 0.000 | 0.000 | 0.000  | 0.000 | 0.000 | 0.000 | 0.000 | 0.000 | 0.000  | 28.000 | 7.969 | 48.315 | 12.152 | 15.414 | 6.585 |
| cis-1,3-dimethylcyclopentane                                                                                                                                                                                                                                                                                            | HC     | 0.046  | 0.006 | 0.022 | 0.021 | 0.021  | 0.007 | 0.634 | 0.098 | 0.440 | 0.105 | 0.845  | 0.455  | 0.959 | 0.016  | 0.112  | 0.022  | 0.062 |
| methyloxycyclohexane                                                                                                                                                                                                                                                                                                    | HC     | 0.061  | 0.012 | 0.027 | 0.031 | 0.036  | 0.016 | 1.460 | 0.161 | 0.835 | 0.142 | 1.591  | 0.818  | 0.144 | 0.072  | 0.381  | 0.084  | 0.175 |
| toluene                                                                                                                                                                                                                                                                                                                 | HC     | 0.000  | 0.000 | 0.000 | 0.000 | 0.000  | 0.000 | 0.000 | 0.000 | 0.000 | 0.000 | 0.000  | 1.106  | 0.828 | 3.244  | 0.891  | 1.951  | 0.997 |
| 2-Oxetene                                                                                                                                                                                                                                                                                                               | HC     | 0.487  | 0.117 | 0.406 | 0.308 | 0.366  | 0.167 | 1.800 | 0.779 | 0.010 | 0.007 | 0.531  | 0.251  | 0.634 | 0.231  | 0.384  | 0.112  | 0.152 |
| ethylbenzene                                                                                                                                                                                                                                                                                                            | HC     | 0.158  | 0.075 | 0.024 | 0.024 | 0.084  | 0.039 | 0.029 | 0.029 | 0.000 | 0.000 | 0.000  | 0.142  | 0.110 | 0.351  | 0.086  | 0.151  | 0.071 |
| styrene                                                                                                                                                                                                                                                                                                                 | HC     | 0.432  | 0.120 | 0.123 | 0.090 | 0.256  | 0.109 | 0.061 | 0.049 | 0.000 | 0.000 | 0.000  | 0.238  | 0.141 | 0.470  | 0.115  | 0.201  | 0.093 |
| p-xylene                                                                                                                                                                                                                                                                                                                | HC     | 0.472  | 0.060 | 0.139 | 0.073 | 0.273  | 0.082 | 0.569 | 0.139 | 0.072 | 0.062 | 0.148  | 0.050  | 0.262 | 0.115  | 0.148  | 0.050  | 0.187 |
| m-xylene                                                                                                                                                                                                                                                                                                                | HC     | 0.438  | 0.086 | 0.106 | 0.068 | 0.269  | 0.112 | 0.188 | 0.073 | 0.000 | 0.000 | 0.017  | 0.017  | 0.235 | 0.114  | 0.330  | 0.076  | 0.163 |
| 1-ethyl-4-methylbenzene                                                                                                                                                                                                                                                                                                 | HC     | 0.184  | 0.022 | 0.058 | 0.057 | 0.123  | 0.041 | 0.126 | 0.020 | 0.008 | 0.002 | 0.058  | 0.018  | 0.080 | 0.018  | 0.040  | 0.010  | 0.042 |
| undecane                                                                                                                                                                                                                                                                                                                | HC     | 0.483  | 0.068 | 0.163 | 0.077 | 0.301  | 0.101 | 0.321 | 0.081 | 0.016 | 0.005 | 0.148  | 0.055  | 0.283 | 0.064  | 0.114  | 0.026  | 0.095 |
| undecane                                                                                                                                                                                                                                                                                                                | HC     | 12.280 | 1.934 | 7.562 | 2.146 | 9.148  | 1.999 | 4.057 | 0.790 | 0.922 | 0.918 | 2.159  | 0.545  | 1.154 | 0.412  | 1.365  | 0.525  | 0.645 |
| undecane                                                                                                                                                                                                                                                                                                                | HC     | 0.128  | 0.012 | 0.029 | 0.014 | 0.069  | 0.021 | 0.064 | 0.012 | 0.006 | 0.005 | 0.030  | 0.007  | 0.011 | 0.009  | 0.004  | 0.025  | 0.008 |
| pentylbenzene                                                                                                                                                                                                                                                                                                           | HC     | 0.015  | 0.001 | 0.005 | 0.002 | 0.012  | 0.004 | 0.011 | 0.001 | 0.001 | 0.000 | 0.021  | 0.012  | 0.141 | 0.133  | 0.006  | 0.002  | 0.006 |
| hexanes, (1,1-dimethylpropyl)-                                                                                                                                                                                                                                                                                          | HC     | 0.644  | 0.020 | 0.083 | 0.033 | 0.132  | 0.035 | 4.470 | 1.569 | 1.109 | 0.644 | 3.396  | 1.301  | 0.053 | 0.021  | 0.053  | 0.012  | 0.032 |
| undecane                                                                                                                                                                                                                                                                                                                | HC     | 17.361 | 1.910 | 7.368 | 3.315 | 13.493 | 4.614 | 9.885 | 1.435 | 2.065 | 1.182 | 6.650  | 1.957  | 6.595 | 1.270  | 7.380  | 2.155  | 3.477 |
| 1,4-dichlorobenzene                                                                                                                                                                                                                                                                                                     | HC     | 0.064  | 0.000 | 0.002 | 0.001 | 0.005  | 0.002 | 0.005 | 0.000 | 0.001 | 0.001 | 0.005  | 0.002  | 0.107 | 0.103  | 0.004  | 0.001  |       |
| undecane                                                                                                                                                                                                                                                                                                                | HC     | 0.270  | 0.021 | 0.096 | 0.037 | 0.188  | 0.054 | 0.286 | 0.014 | 0.036 | 0.005 | 0.320  | 0.033  | 0.445 | 0.025  | 0.097  | 0.020  | 0.083 |
| undecane                                                                                                                                                                                                                                                                                                                | HC     | 0.052  | 0.029 | 0.191 | 0.148 | 0.161  | 0.104 | 0.047 | 0.017 | 0.054 | 0.020 | 0.261  | 0.148  | 0.035 | 0.022  | 0.261  | 0.399  | 0.057 |
| undecane                                                                                                                                                                                                                                                                                                                | HC     | 0.043  | 0.016 | 0.106 | 0.073 | 0.092  | 0.051 | 0.040 | 0.009 | 0.042 | 0.016 | 0.132  | 0.069  | 0.031 | 0.130  | 0.190  | 0.049  | 0.034 |
| undecane                                                                                                                                                                                                                                                                                                                | HC     | 0.187  | 0.019 | 0.171 | 0.106 | 0.201  | 0.078 | 0.158 | 0.040 | 0.004 | 0.002 | 0.081  | 0.021  | 0.061 | 0.019  | 0.042  | 0.011  | 0.023 |
| tridecane                                                                                                                                                                                                                                                                                                               | HC     | 0.580  | 0.029 | 0.313 | 0.168 | 0.388  | 0.143 | 0.665 | 0.097 | 0.075 | 0.044 | 0.524  | 0.205  | 0.352 | 0.112  | 0.268  | 0.067  | 0.272 |
| oxolycyclohexane                                                                                                                                                                                                                                                                                                        | HC     | 0.111  | 0.012 | 0.061 | 0.024 | 0.089  | 0.025 | 0.474 | 1.253 | 1.102 | 0.219 | 3.175  | 1.252  | 0.047 | 0.026  | 0.025  | 0.020  | 0.038 |
| hexanes, (1,1-dimethylpropyl)-                                                                                                                                                                                                                                                                                          | HC     | 0.480  | 0.369 | 1.201 | 0.684 | 1.401  | 0.515 | 1.873 | 1.176 | 1.181 | 0.031 | 12.117 | 0.111  | 1.033 | 0.291  | 0.064  | 0.345  | 0.062 |
| undecane                                                                                                                                                                                                                                                                                                                | HC     | 0.695  | 0.100 | 0.322 | 0.189 | 0.467  | 0.187 | 0.386 | 0.037 | 0.007 | 0.002 | 0.277  | 0.099  | 0.211 | 0.055  | 0.122  | 0.058  | 0.096 |
| undecane                                                                                                                                                                                                                                                                                                                | HC     | 0.703  | 0.060 | 0.382 | 0.161 | 0.619  | 0.193 | 0.783 | 0.035 | 0.234 | 0.036 | 0.687  | 0.254  | 0.349 | 0.114  | 0.379  | 0.132  | 0.300 |
| undecane                                                                                                                                                                                                                                                                                                                | HC     | 0.140  | 0.020 | 0.067 | 0.022 | 0.142  | 0.042 | 0.084 | 0.020 | 0.053 | 0.002 | 0.962  | 0.027  | 0.046 | 0.013  | 0.022  | 0.011  | 0.023 |
| undecane                                                                                                                                                                                                                                                                                                                | HC     | 3.521  | 0.430 | 1.527 | 0.817 | 1.882  | 0.690 | 2.991 | 0.377 | 0.407 | 0.039 | 1.861  | 0.638  | 1.842 | 0.437  | 1.560  | 0.380  | 0.938 |
| 10-undecene, 2,3-dihydro-1,1,3-trimethyl-3-phenyl-                                                                                                                                                                                                                                                                      | HC     | 0.268  | 0.022 | 0.123 | 0.043 | 0.207  | 0.059 | 0.187 | 0.013 | 0.059 | 0.003 | 0.151  | 0.049  | 0.149 | 0.028  | 0.165  | 0.030  | 0.026 |
| undecane                                                                                                                                                                                                                                                                                                                | HC     | 0.489  | 0.028 | 0.230 | 0.118 | 0.300  | 0.086 | 0.516 | 0.026 | 0.085 | 0.006 | 0.216  | 0.077  | 0.222 | 0.078  | 0.153  | 0.082  | 0.029 |
| undecane                                                                                                                                                                                                                                                                                                                | HC     | 0.479  | 0.066 | 0.217 | 0.075 | 0.303  | 0.087 | 0.599 | 0.090 | 0.005 | 0.008 | 0.342  | 0.094  | 0.434 | 0.117  | 0.371  | 0.074  | 0.188 |
| α-pinene                                                                                                                                                                                                                                                                                                                | MT     | 2.030  | 0.289 | 0.851 | 0.379 | 1.487  | 0.477 | 0.356 | 0.104 | 0.184 | 0.500 | 0.276  | 0.084  | 0.045 | 0.013  | 0.052  | 0.020  | 0.056 |
| β-pinene                                                                                                                                                                                                                                                                                                                | MT     | 0.051  | 0.024 | 0.107 | 0.052 | 0.142  | 0.042 | 0.084 | 0.020 | 0.008 | 0.002 | 0.082  | 0.019  | 0.008 | 0.019  | 0.008  | 0.015  | 0.008 |
| β-pinene                                                                                                                                                                                                                                                                                                                | MT     | 0.520  | 0.127 | 0.181 | 0.086 | 0.310  | 0.101 | 0.127 | 0.057 | 0.086 | 0.024 | 0.088  | 0.031  | 0.374 | 0.355  | 0.014  | 0.010  | 0.027 |
| myrcene                                                                                                                                                                                                                                                                                                                 | MT     | 0.091  | 0.009 | 0.084 | 0.044 | 0.092  | 0.029 | 0.100 | 0.025 | 0.085 | 0.034 | 0.105  | 0.035  | 0.040 | 0.011  | 0.039  | 0.008  | 0.045 |
| 1-cyclohexene                                                                                                                                                                                                                                                                                                           | MT     | 0.145  | 0.080 | 0.236 | 0.147 | 0.566  | 0.171 | 0.197 | 0.056 | 0.011 | 0.003 | 0.994  | 0.026  | 0.099 | 0.018  | 0.012  | 0.006  | 0.033 |
| α-cymene                                                                                                                                                                                                                                                                                                                | MT     | 0.195  | 0.020 | 0.099 | 0.045 | 0.151  | 0.045 | 0.123 | 0.024 | 0.037 | 0.017 | 0.098  | 0.077  | 0.075 | 0.017  | 0.042  | 0.012  | 0.018 |
| limonene                                                                                                                                                                                                                                                                                                                | MT     | 1.813  | 0.547 | 0.825 | 0.585 | 1.169  | 0.514 | 0.705 | 0.200 | 0.162 | 0.035 | 0.355  | 0.113  | 0.392 | 0.098  | 0.269  | 0.062  | 0.186 |
| α-cymene                                                                                                                                                                                                                                                                                                                | MT     | 12.831 | 3.074 | 4.509 | 1.861 | 8.224  | 2.183 | 4.271 | 1.480 | 0.313 | 3.313 | 0.776  | 4.499  | 0.552 | 4.448  | 2.200  | 1.271  | 0.899 |
| α-cymene                                                                                                                                                                                                                                                                                                                | MT     | 8.395  | 1.629 | 1.106 | 2.075 | 1.168  | 0.171 | 2.929 | 0.669 | 1.604 | 5.263 | 21.228 | 6.699  | 0.901 | 0.332  | 1.180  | 1.326  | 0.856 |
| γ-cis-pinene                                                                                                                                                                                                                                                                                                            | MT     | 0.023  | 0.004 | 0.015 | 0.007 | 0.023  | 0.009 | 0.050 | 0.017 | 0.023 | 0.009 | 0.026  | 0.003  | 0.023 | 0.004  | 0.016  | 0.010  | 0.008 |
| terpinene                                                                                                                                                                                                                                                                                                               | MT     | 0.062  | 0.036 | 0.026 | 0.013 | 0.046  | 0.014 | 0.056 | 0.006 | 0.022 | 0.009 | 0.032  | 0.012  | 0.015 | 0.008  | 0.022  | 0.007  |       |
| α-cymene                                                                                                                                                                                                                                                                                                                | MT     | 0.078  | 0.007 | 0.042 | 0.017 | 0.067  | 0.021 | 0.074 | 0.009 | 0.031 | 0.007 | 0.057  | 0.116  | 0.042 | 0.009  | 0.044  | 0.009  | 0.031 |
| α-cymene                                                                                                                                                                                                                                                                                                                | MT     | 1.211  | 0.162 | 0.614 | 0.266 | 0.923  | 0.287 | 0.845 | 0.133 | 0.331 | 0.167 | 0.557  | 0.189  | 0.524 | 0.110  | 0.875  | 0.118  | 0.258 |
| undecane                                                                                                                                                                                                                                                                                                                | Other  | 0.190  | 0.014 | 0.116 | 0.054 | 0.165  | 0.055 | 0.284 | 0.051 | 0.103 | 0.003 | 0.145  | 0.053  | 0.112 | 0.031  | 0.122  | 0.027  | 0.062 |
| undecane                                                                                                                                                                                                                                                                                                                | Other  | 0.089  | 0.013 | 0.091 | 0.011 | 0.025  | 0.008 | 0.012 | 0.003 | 0.005 | 0.002 | 0.002  | 0.002  | 0.002 | 0.002  | 0.002  | 0.002  | 0.002 |
| undecane                                                                                                                                                                                                                                                                                                                | Other  | 0.078  | 0.015 | 0.029 | 0.009 | 0.057  | 0.023 | 0.084 | 0.018 | 0.028 | 0.010 | 0.055  | 0.025  | 0.063 | 0.012  | 0.090  | 0.030  | 0.031 |
| undecane                                                                                                                                                                                                                                                                                                                | Other  | 0.224  | 0.010 | 0.153 | 0.065 | 0.185  | 0.066 | 0.264 | 0.029 | 0.039 | 0.012 | 0.145  | 0.055  | 0.189 | 0.037  | 0.181  | 0.039  | 0.108 |
| undecane                                                                                                                                                                                                                                                                                                                | Other  | 0.361  | 0.045 | 0.234 | 0.093 | 0.347  | 0.107 | 0.487 | 0.087 | 0.066 | 0.016 | 0.516  | 0.167  | 0.216 | 0.156  | 0.066  | 0.062  | 0.029 |
| undecane                                                                                                                                                                                                                                                                                                                | Other  | 0.257  | 0.086 | 0.026 | 0.016 | 0.224  | 0.160 | 0.238 | 0.075 | 0.169 | 0.091 | 0.380  | 0.137  | 0.100 | 0.061  | 0.050  | 0.117  | 0.029 |
| undecane                                                                                                                                                                                                                                                                                                                | Other  | 0.016  | 0.002 | 0.011 | 0.004 | 0.013  | 0.004 | 0.011 | 0.002 | 0.002 | 0.001 | 0.005  | 0.003  | 0.007 | 0.001  | 0.009  | 0.003  | 0.006 |
| undecane                                                                                                                                                                                                                                                                                                                | Other  | 0.441  | 0.183 | 0.643 | 0.177 | 0.604  | 0.186 | 0.462 | 0.208 | 0.223 | 0.089 | 0.297  | 0.129  | 0.432 | 0.157  | 0.122  | 0.068  | 0.235 |
| undecane                                                                                                                                                                                                                                                                                                                | Other  | 0.018  | 0.009 | 0.063 | 0.017 | 0.056  | 0.026 | 0.060 | 0.009 | 0.093 | 0.027 | 0.742  | 0.536  | 0.049 | 0.010  | 0.046  | 0.004  | 0.062 |
| undecane                                                                                                                                                                                                                                                                                                                | Other  | 0.016  | 0.018 | 0.068 | 0.018 | 0.047  | 0.016 | 0.047 | 0.016 | 0.008 | 0.004 | 0.024  | 0.008  | 0.004 | 0.004  | 0.004  | 0.004  | 0.004 |
| undecane                                                                                                                                                                                                                                                                                                                | Other  | 0.038  | 0.017 | 0.371 | 0.256 | 0.037  | 0.022 | 0.427 | 0.240 | 0.243 | 0.115 | 1.069  | 0.971  | 0.026 | 0.041  | 0.241  | 0.098  | 0.045 |
| undecane                                                                                                                                                                                                                                                                                                                | Other  | 0.435  | 0.043 | 0.229 | 0.099 | 0.384  | 0.116 | 0.423 | 0.046 |       |       |        |        |       |        |        |        |       |









| Compounds                     | Emission rates (mean ± S.E., µg m <sup>-3</sup> h <sup>-1</sup> ) of individual compounds from mesocosms from Paks (P1 and P2) sites under control (C), warming (W), increased cloudiness (P-AR), and warming + increased cloudiness (W-P-AR) treatments in late August of the first growing season. |       |       |       |       |        |       |       |       |        |       |        | W-P-AR |        |       |        |        |       |       |        |        |       |       |       |       |       |
|-------------------------------|------------------------------------------------------------------------------------------------------------------------------------------------------------------------------------------------------------------------------------------------------------------------------------------------------|-------|-------|-------|-------|--------|-------|-------|-------|--------|-------|--------|--------|--------|-------|--------|--------|-------|-------|--------|--------|-------|-------|-------|-------|-------|
|                               | Groups                                                                                                                                                                                                                                                                                               | T1    |       |       | T2    |        |       | T2    |       |        | T2    |        |        | T1     | P     | S.E.   | T2     |       |       |        |        |       |       |       |       |       |
|                               |                                                                                                                                                                                                                                                                                                      | Mean  | S.E.  | Mean  | S.E.  | Mean   | S.E.  | Mean  | S.E.  | Mean   | S.E.  | Mean   | S.E.   |        |       |        |        |       |       |        |        |       |       |       |       |       |
| 1-benzene                     | HC                                                                                                                                                                                                                                                                                                   | 0.445 | 3.476 | 2.611 | 2.610 | 11.389 | 8.247 | 2.08  | 2.477 | 14.041 | 8.389 | 15.344 | 9.397  | 11.728 | 6.655 | 10.258 | 10.273 | 9.786 | 7.221 | 7.211  | 8.424  | 2.842 | 8.433 | 4.428 |       |       |
| 1,3-dimethylbenzene           | HC                                                                                                                                                                                                                                                                                                   | 0.000 | 0.000 | 0.000 | 0.000 | 0.157  | 0.157 | 0.000 | 0.000 | 0.000  | 0.000 | 0.000  | 0.000  | 1.564  | 1.340 | 1.196  | 1.196  | 0.000 | 0.000 | 0.000  | 1.761  | 1.870 | 0.000 | 0.000 | 3.454 | 2.182 |
| 2-methylbenzene               | HC                                                                                                                                                                                                                                                                                                   | 0.000 | 0.000 | 0.000 | 0.000 | 0.000  | 0.000 | 0.000 | 0.000 | 0.000  | 0.000 | 0.000  | 0.000  | 2.541  | 1.959 | 1.197  | 1.197  | 0.000 | 0.000 | 0.000  | 11.700 | 3.159 | 0.000 | 0.000 | 6.219 | 2.523 |
| 1-ethylbenzene                | HC                                                                                                                                                                                                                                                                                                   | 0.000 | 0.000 | 0.000 | 0.000 | 0.768  | 0.768 | 0.000 | 0.000 | 0.000  | 0.000 | 0.000  | 0.000  | 2.284  | 2.338 | 0.845  | 0.845  | 0.844 | 0.844 | 12.260 | 1.260  | 0.000 | 0.000 | 3.701 | 2.787 | 2.862 |
| undetermined HC 1             | HC                                                                                                                                                                                                                                                                                                   | 0.000 | 0.000 | 0.000 | 0.000 | 0.968  | 0.968 | 0.000 | 0.000 | 0.000  | 0.000 | 0.000  | 0.000  | 4.058  | 2.909 | 1.254  | 1.254  | 0.000 | 0.000 | 0.000  | 15.317 | 4.229 | 0.000 | 0.000 | 7.684 | 4.740 |
| 1,2,3-trimethylbenzene        | HC                                                                                                                                                                                                                                                                                                   | 0.000 | 0.000 | 0.000 | 0.000 | 0.000  | 0.000 | 0.000 | 0.000 | 0.000  | 0.000 | 0.000  | 0.000  | 0.001  | 0.001 | 0.000  | 0.000  | 0.000 | 0.000 | 0.000  | 1.858  | 1.858 | 0.000 | 0.000 | 0.927 | 0.643 |
| 1,4-dimethylpiperazine        | HC                                                                                                                                                                                                                                                                                                   | 0.000 | 0.000 | 0.000 | 0.000 | 0.117  | 0.117 | 0.000 | 0.000 | 0.000  | 0.000 | 0.000  | 0.000  | 0.073  | 0.506 | 0.157  | 0.157  | 0.000 | 0.000 | 0.000  | 2.758  | 0.783 | 0.000 | 0.000 | 1.363 | 0.864 |
| methylcyclohexane             | HC                                                                                                                                                                                                                                                                                                   | 0.000 | 0.000 | 0.000 | 0.000 | 0.008  | 0.008 | 0.000 | 0.000 | 0.000  | 0.000 | 0.000  | 0.000  | 0.272  | 0.270 | 0.026  | 0.026  | 0.133 | 0.133 | 1.374  | 0.401  | 0.569 | 0.250 | 1.81  | 0.247 |       |
| 1,2,3-trimethylbenzene        | HC                                                                                                                                                                                                                                                                                                   | 0.000 | 0.000 | 0.000 | 0.000 | 0.000  | 0.000 | 0.000 | 0.000 | 0.000  | 0.000 | 0.000  | 0.000  | 0.134  | 0.134 | 0.000  | 0.000  | 0.396 | 0.396 | 0.000  | 0.000  | 0.000 | 1.000 | 0.61  | 1.059 | 0.444 |
| 1,3-dimethylbenzene           | HC                                                                                                                                                                                                                                                                                                   | 0.000 | 0.000 | 0.000 | 0.000 | 0.000  | 0.000 | 0.000 | 0.000 | 0.000  | 0.000 | 0.000  | 0.000  | 0.000  | 0.000 | 0.000  | 0.000  | 0.000 | 0.000 | 0.000  | 0.000  | 0.000 | 0.000 | 0.000 | 0.000 | 0.000 |
| 1,4-dimethylbenzene           | HC                                                                                                                                                                                                                                                                                                   | 0.045 | 0.019 | 0.062 | 0.037 | 0.043  | 0.019 | 0.058 | 0.025 | 0.015  | 0.015 | 0.025  | 0.012  | 0.041  | 0.020 | 0.023  | 0.016  | 0.018 | 0.014 | 0.011  | 0.008  | 0.024 | 0.016 | 0.008 | 0.008 | 0.008 |
| undetermined HC 2             | HC                                                                                                                                                                                                                                                                                                   | 0.086 | 0.020 | 0.097 | 0.028 | 0.131  | 0.019 | 0.125 | 0.060 | 0.076  | 0.051 | 0.169  | 0.030  | 0.067  | 0.022 | 0.071  | 0.028  | 0.116 | 0.013 | 0.155  | 0.045  | 0.132 | 0.051 | 0.100 | 0.016 |       |
| 1,2,4-trimethylbenzene        | HC                                                                                                                                                                                                                                                                                                   | 0.001 | 0.001 | 0.000 | 0.000 | 0.105  | 0.105 | 0.111 | 0.111 | 0.287  | 0.287 | 0.304  | 0.192  | 0.009  | 0.009 | 0.124  | 0.124  | 0.013 | 0.013 | 0.086  | 0.086  | 0.024 | 0.021 | 0.072 | 0.072 |       |
| 2,4-dimethyl-1-heptene        | HC                                                                                                                                                                                                                                                                                                   | 0.010 | 0.007 | 0.065 | 0.065 | 0.063  | 0.055 | 0.056 | 0.056 | 0.114  | 0.102 | 0.117  | 0.072  | 0.020  | 0.013 | 0.070  | 0.070  | 0.027 | 0.025 | 0.043  | 0.041  | 0.019 | 0.018 | 0.019 | 0.017 |       |
| 1,3-dimethylbenzene           | HC                                                                                                                                                                                                                                                                                                   | 0.000 | 0.000 | 0.000 | 0.000 | 0.000  | 0.000 | 0.000 | 0.000 | 0.000  | 0.000 | 0.000  | 0.000  | 0.000  | 0.000 | 0.000  | 0.000  | 0.000 | 0.000 | 0.000  | 0.000  | 0.000 | 0.000 | 0.000 | 0.000 |       |
| 1,4-dimethylbenzene           | HC                                                                                                                                                                                                                                                                                                   | 0.000 | 0.000 | 0.000 | 0.000 | 0.000  | 0.000 | 0.000 | 0.000 | 0.000  | 0.000 | 0.000  | 0.000  | 0.000  | 0.000 | 0.000  | 0.000  | 0.000 | 0.000 | 0.000  | 0.000  | 0.000 | 0.000 | 0.000 | 0.000 |       |
| 1,2,3-trimethylbenzene        | HC                                                                                                                                                                                                                                                                                                   | 0.025 | 0.021 | 0.067 | 0.053 | 0.032  | 0.027 | 0.056 | 0.056 | 0.108  | 0.089 | 0.100  | 0.090  | 0.064  | 0.056 | 0.115  | 0.115  | 0.026 | 0.026 | 0.097  | 0.096  | 0.034 | 0.030 | 0.030 | 0.030 | 0.030 |
| 1,4-cis-1,2-methylcyclohexane | HC                                                                                                                                                                                                                                                                                                   | 0.009 | 0.009 | 0.006 | 0.003 | 0.061  | 0.061 | 0.066 | 0.066 | 0.136  | 0.136 | 0.142  | 0.101  | 0.387  | 0.339 | 0.172  | 0.172  | 0.075 | 0.075 | 0.217  | 0.217  | 0.033 | 0.033 | 0.033 | 0.033 |       |
| 1,4-cis-1,2-methylcyclohexane | HC                                                                                                                                                                                                                                                                                                   | 0.009 | 0.009 | 0.006 | 0.003 | 0.061  | 0.061 | 0.066 | 0.066 | 0.136  | 0.136 | 0.142  | 0.101  | 0.387  | 0.339 | 0.172  | 0.172  | 0.075 | 0.075 | 0.217  | 0.217  | 0.033 | 0.033 | 0.033 | 0.033 |       |
| 1,4-cis-1,2-methylcyclohexane | HC                                                                                                                                                                                                                                                                                                   | 0.009 | 0.009 | 0.006 | 0.003 | 0.061  | 0.061 | 0.066 | 0.066 | 0.136  | 0.136 | 0.142  | 0.101  | 0.387  | 0.339 | 0.172  | 0.172  | 0.075 | 0.075 | 0.217  | 0.217  | 0.033 | 0.033 | 0.033 | 0.033 |       |
| 1,4-cis-1,2-methylcyclohexane | HC                                                                                                                                                                                                                                                                                                   | 0.009 | 0.009 | 0.006 | 0.003 | 0.061  | 0.061 | 0.066 | 0.066 | 0.136  | 0.136 | 0.142  | 0.101  | 0.387  | 0.339 | 0.172  | 0.172  | 0.075 | 0.075 | 0.217  | 0.217  | 0.033 | 0.033 | 0.033 | 0.033 |       |
| 1,4-cis-1,2-methylcyclohexane | HC                                                                                                                                                                                                                                                                                                   | 0.009 | 0.009 | 0.006 | 0.003 | 0.061  | 0.061 | 0.066 | 0.066 | 0.136  | 0.136 | 0.142  | 0.101  | 0.387  | 0.339 | 0.172  | 0.172  | 0.075 | 0.075 | 0.217  | 0.217  | 0.033 | 0.033 | 0.033 | 0.033 |       |
| 1,4-cis-1,2-methylcyclohexane | HC                                                                                                                                                                                                                                                                                                   | 0.009 | 0.009 | 0.006 | 0.003 | 0.061  | 0.061 | 0.066 | 0.066 | 0.136  | 0.136 | 0.142  | 0.101  | 0.387  | 0.339 | 0.172  | 0.172  | 0.075 | 0.075 | 0.217  | 0.217  | 0.033 | 0.033 | 0.033 | 0.033 |       |
| 1,4-cis-1,2-methylcyclohexane | HC                                                                                                                                                                                                                                                                                                   | 0.009 | 0.009 | 0.006 | 0.003 | 0.061  | 0.061 | 0.066 | 0.066 | 0.136  | 0.136 | 0.142  | 0.101  | 0.387  | 0.339 | 0.172  | 0.172  | 0.075 | 0.075 | 0.217  | 0.217  | 0.033 | 0.033 | 0.033 | 0.033 |       |
| 1,4-cis-1,2-methylcyclohexane | HC                                                                                                                                                                                                                                                                                                   | 0.009 | 0.009 | 0.006 | 0.003 | 0.061  | 0.061 | 0.066 | 0.066 | 0.136  | 0.136 | 0.142  | 0.101  | 0.387  | 0.339 | 0.172  | 0.172  | 0.075 | 0.075 | 0.217  | 0.217  | 0.033 | 0.033 | 0.033 | 0.033 |       |
| 1,4-cis-1,2-methylcyclohexane | HC                                                                                                                                                                                                                                                                                                   | 0.009 | 0.009 | 0.006 | 0.003 | 0.061  | 0.061 | 0.066 | 0.066 | 0.136  | 0.136 | 0.142  | 0.101  | 0.387  | 0.339 | 0.172  | 0.172  | 0.075 | 0.075 | 0.217  | 0.217  | 0.033 | 0.033 | 0.033 | 0.033 |       |
| 1,4-cis-1,2-methylcyclohexane | HC                                                                                                                                                                                                                                                                                                   | 0.009 | 0.009 | 0.006 | 0.003 | 0.061  | 0.061 | 0.066 | 0.066 | 0.136  | 0.136 | 0.142  | 0.101  | 0.387  | 0.339 | 0.172  | 0.172  | 0.075 | 0.075 | 0.217  | 0.217  | 0.033 | 0.033 | 0.033 | 0.033 |       |
| 1,4-cis-1,2-methylcyclohexane | HC                                                                                                                                                                                                                                                                                                   | 0.009 | 0.009 | 0.006 | 0.003 | 0.061  | 0.061 | 0.066 | 0.066 | 0.136  | 0.136 | 0.142  | 0.101  | 0.387  | 0.339 | 0.172  | 0.172  | 0.075 | 0.075 | 0.217  | 0.217  | 0.033 | 0.033 | 0.033 | 0.033 |       |
| 1,4-cis-1,2-methylcyclohexane | HC                                                                                                                                                                                                                                                                                                   | 0.009 | 0.009 | 0.006 | 0.003 | 0.061  | 0.061 | 0.066 | 0.066 | 0.136  | 0.136 | 0.142  | 0.101  | 0.387  | 0.339 | 0.172  | 0.172  | 0.075 | 0.075 | 0.217  | 0.217  | 0.033 | 0.033 | 0.033 | 0.033 |       |
| 1,4-cis-1,2-methylcyclohexane | HC                                                                                                                                                                                                                                                                                                   | 0.009 | 0.009 | 0.006 | 0.003 | 0.061  | 0.061 | 0.066 | 0.066 | 0.136  | 0.136 | 0.142  | 0.101  | 0.387  | 0.339 | 0.172  | 0.172  | 0.075 | 0.075 | 0.217  | 0.217  | 0.033 | 0.033 | 0.033 | 0.033 |       |
| 1,4-cis-1,2-methylcyclohexane | HC                                                                                                                                                                                                                                                                                                   | 0.009 | 0.009 | 0.006 | 0.003 | 0.061  | 0.061 | 0.066 | 0.066 | 0.136  | 0.136 | 0.142  | 0.101  | 0.387  | 0.339 | 0.172  | 0.172  | 0.075 | 0.075 | 0.217  | 0.217  | 0.033 | 0.033 | 0.033 | 0.033 |       |
| 1,4-cis-1,2-methylcyclohexane | HC                                                                                                                                                                                                                                                                                                   | 0.009 | 0.009 | 0.006 | 0.003 | 0.061  | 0.061 | 0.066 | 0.066 | 0.136  | 0.136 | 0.142  | 0.101  | 0.387  | 0.339 | 0.172  | 0.172  | 0.075 | 0.075 | 0.217  | 0.217  | 0.033 | 0.033 | 0.033 | 0.033 |       |
| 1,4-cis-1,2-methylcyclohexane | HC                                                                                                                                                                                                                                                                                                   | 0.009 | 0.009 | 0.006 | 0.003 | 0.061  | 0.061 | 0.066 | 0.066 | 0.136  | 0.136 | 0.142  | 0.101  | 0.387  | 0.339 | 0.172  | 0.172  | 0.075 | 0.075 | 0.217  | 0.217  | 0.033 | 0.033 | 0.033 | 0.033 |       |
| 1,4-cis-1,2-methylcyclohexane | HC                                                                                                                                                                                                                                                                                                   | 0.009 | 0.009 | 0.006 | 0.003 | 0.061  | 0.061 | 0.066 | 0.066 | 0.136  | 0.136 | 0.142  | 0.101  | 0.387  | 0.339 | 0.172  | 0.172  | 0.075 | 0.075 | 0.217  | 0.217  | 0.033 | 0.033 | 0.033 | 0.033 |       |
| 1,4-cis-1,2-methylcyclohexane | HC                                                                                                                                                                                                                                                                                                   | 0.009 | 0.009 | 0.006 | 0.003 | 0.061  | 0.061 | 0.066 | 0.066 | 0.136  | 0.136 | 0.142  | 0.101  | 0.387  | 0.339 | 0.172  | 0.172  | 0.075 | 0.075 | 0.217  | 0.217  | 0.033 | 0.033 | 0.033 | 0.033 |       |
| 1,4-cis-1,2-methylcyclohexane | HC                                                                                                                                                                                                                                                                                                   | 0.009 | 0.009 | 0.006 | 0.003 | 0.061  | 0.061 | 0.066 | 0.066 | 0.136  | 0.136 | 0.142  | 0.101  | 0.387  | 0.339 | 0.172  | 0.172  | 0.075 | 0.075 | 0.217  | 0.217  | 0.033 | 0.033 | 0.033 | 0.033 |       |
| 1,4-cis-1,2-methylcyclohexane | HC                                                                                                                                                                                                                                                                                                   | 0.009 | 0.009 | 0.006 | 0.003 | 0.061  | 0.061 | 0.066 | 0.066 | 0.136  | 0.136 | 0.142  | 0.101  | 0.387  | 0.339 | 0.172  | 0.172  | 0.075 | 0.075 | 0.217  | 0.217  | 0.033 | 0.033 | 0.033 | 0.033 |       |
| 1,4-cis-1,2-methylcyclohexane | HC                                                                                                                                                                                                                                                                                                   | 0.009 | 0.009 | 0.006 | 0.003 | 0.061  | 0.061 | 0.066 | 0.066 | 0.136  | 0.136 | 0.142  | 0.101  | 0.387  | 0.339 | 0.172  | 0.172  | 0.075 | 0.075 | 0.217  | 0.217  | 0.033 | 0.033 | 0.033 | 0.033 |       |
| 1,4-cis-1,2-methylcyclohexane | HC                                                                                                                                                                                                                                                                                                   | 0.009 | 0.009 | 0.006 | 0.003 | 0.061  | 0.061 | 0.066 | 0.066 | 0.136  | 0.136 | 0.142  | 0.101  | 0.387  | 0.339 | 0.172  | 0.172  | 0.075 | 0.075 | 0.217  | 0.217  | 0.033 | 0.033 | 0.033 | 0.033 |       |
| 1,4-cis-1,2-methylcyclohexane | HC                                                                                                                                                                                                                                                                                                   | 0.009 | 0.009 | 0.006 | 0.003 | 0.061  | 0.061 | 0.066 | 0.066 | 0.136  | 0.136 | 0.142  | 0.101  | 0.387  | 0.339 | 0.172  | 0.172  | 0.075 | 0.075 | 0.217  | 0.217  | 0.033 | 0.033 | 0.033 | 0.033 |       |
| 1,4-cis-1,2-methylcyclohexane | HC                                                                                                                                                                                                                                                                                                   | 0.009 | 0.009 |       |       |        |       |       |       |        |       |        |        |        |       |        |        |       |       |        |        |       |       |       |       |       |



| Compounds            |    | Groups |       | Emission rates (mean ± S.E., μg m <sup>-3</sup> h <sup>-1</sup> ) of individual compounds from mesocosms from Palau (P), tundra1 (T1), and tundra2 (T2) sites under control (C), warming (W), increased cloudiness (i-PAR), and warming + increased cloudiness (W+PAR) treatments in mid-June of the second growing season. |       |       |       |       |       |       |       |       |       |       |       |        |        |       |       |       |       |       |       |       |       |
|----------------------|----|--------|-------|-----------------------------------------------------------------------------------------------------------------------------------------------------------------------------------------------------------------------------------------------------------------------------------------------------------------------------|-------|-------|-------|-------|-------|-------|-------|-------|-------|-------|-------|--------|--------|-------|-------|-------|-------|-------|-------|-------|-------|
|                      |    |        |       | C                                                                                                                                                                                                                                                                                                                           |       |       |       | W     |       |       |       | i-PAR |       |       |       | W+PAR  |        |       |       |       |       |       |       |       |       |
|                      |    |        |       | Mean                                                                                                                                                                                                                                                                                                                        | S.E.  | Mean  | S.E.  | Mean  | S.E.  | Mean  | S.E.  | Mean  | S.E.  | Mean  | S.E.  | Mean   | S.E.   | Mean  | S.E.  |       |       |       |       |       |       |
| 1,1-dichloroethane   | HC | 0.06   | 0.06  | 0.029                                                                                                                                                                                                                                                                                                                       | 0.029 | 0.409 | 0.409 | 0.000 | 0.000 | 0.025 | 0.025 | 0.048 | 0.048 | 0.041 | 0.179 | 0.162  | 0.074  | 0.057 | 0.027 | 0.004 | 0.024 | 0.124 | 0.115 | 0.655 | 0.281 |
| 1,3-dimethyl-pentane | HC | 0.470  | 0.129 | 0.539                                                                                                                                                                                                                                                                                                                       | 0.200 | 0.327 | 0.194 | 0.655 | 0.253 | 0.798 | 0.208 | 0.204 | 0.091 | 0.372 | 0.315 | 0.094  | 0.061  | 0.000 | 0.000 | 0.000 | 0.000 | 0.146 | 0.143 | 0.373 | 0.152 |
| n-hexane             | HC | 0.728  | 0.228 | 0.843                                                                                                                                                                                                                                                                                                                       | 0.263 | 2.982 | 2.982 | 0.285 | 0.285 | 4.055 | 4.055 | 1.524 | 1.524 | 2.718 | 2.718 | 32.032 | 31.996 | 1.392 | 1.392 | 0.000 | 0.000 | 0.118 | 0.118 | 7.450 | 3.233 |
| 2,2-dimethyl-butane  | HC | 0.076  | 0.023 | 0.069                                                                                                                                                                                                                                                                                                                       | 0.018 | 0.046 | 0.020 | 0.036 | 0.021 | 0.086 | 0.027 | 0.091 | 0.024 | 0.044 | 0.028 | 0.040  | 0.025  | 0.019 | 0.012 | 0.000 | 0.000 | 0.001 | 0.001 | 0.051 | 0.063 |
| heptane              | HC | 0.077  | 0.024 | 0.074                                                                                                                                                                                                                                                                                                                       | 0.026 | 0.077 | 0.025 | 0.100 | 0.019 | 0.093 | 0.044 | 0.147 | 0.026 | 0.094 | 0.049 | 0.040  | 0.015  | 0.023 | 0.011 | 0.018 | 0.011 | 0.009 | 0.009 | 0.031 | 0.017 |
| isobutene            | HC | 0.286  | 0.129 | 0.300                                                                                                                                                                                                                                                                                                                       | 0.168 | 0.240 | 0.093 | 0.403 | 0.071 | 0.373 | 0.203 | 0.625 | 0.117 | 0.230 | 0.148 | 0.117  | 0.075  | 0.035 | 0.029 | 0.103 | 0.086 | 0.032 | 0.032 | 0.052 | 0.035 |
| octane               | HC | 0.164  | 0.027 | 0.187                                                                                                                                                                                                                                                                                                                       | 0.039 | 0.172 | 0.035 | 0.164 | 0.051 | 0.169 | 0.043 | 0.225 | 0.035 | 0.360 | 0.182 | 0.28   | 0.046  | 0.124 | 0.055 | 0.090 | 0.044 | 0.056 | 0.023 | 0.159 | 0.048 |
| ethylbenzene         | HC | 0.159  | 0.071 | 0.146                                                                                                                                                                                                                                                                                                                       | 0.069 | 0.104 | 0.038 | 0.176 | 0.025 | 0.169 | 0.084 | 0.227 | 0.052 | 0.108 | 0.073 | 0.064  | 0.048  | 0.009 | 0.006 | 0.033 | 0.003 | 0.000 | 0.000 | 0.051 | 0.010 |
| 1,3-dimethyl-benzene | HC | 0.352  | 0.139 | 0.296                                                                                                                                                                                                                                                                                                                       | 0.133 | 0.271 | 0.076 | 0.411 | 0.052 | 0.318 | 0.152 | 0.509 | 0.095 | 0.253 | 0.185 | 0.114  | 0.060  | 0.053 | 0.036 | 0.041 | 0.028 | 0.010 | 0.010 | 0.048 | 0.022 |
| 1-nonyl-3-oxo        | HC | 0.100  | 0.055 | 0.178                                                                                                                                                                                                                                                                                                                       | 0.027 | 0.018 | 0.009 | 0.036 | 0.027 | 0.189 | 0.140 | 0.055 | 0.041 | 0.568 | 0.395 | 0.141  | 0.094  | 0.456 | 0.358 | 0.037 | 0.057 | 0.011 | 0.007 | 0.156 | 0.113 |
| styrene              | HC | 0.086  | 0.035 | 0.164                                                                                                                                                                                                                                                                                                                       | 0.141 | 0.071 | 0.071 | 0.337 | 0.221 | 0.128 | 0.073 | 0.086 | 0.030 | 0.185 | 0.078 | 0.236  | 0.164  | 0.020 | 0.018 | 0.028 | 0.021 | 0.021 | 0.012 | 0.160 | 0.069 |
| p-xylene             | HC | 0.384  | 0.138 | 0.344                                                                                                                                                                                                                                                                                                                       | 0.147 | 0.339 | 0.089 | 0.450 | 0.038 | 0.370 | 0.154 | 0.582 | 0.097 | 0.247 | 0.184 | 0.144  | 0.068  | 0.077 | 0.057 | 0.047 | 0.029 | 0.015 | 0.015 | 0.070 | 0.037 |
| undecane             | HC | 0.187  | 0.070 | 0.240                                                                                                                                                                                                                                                                                                                       | 0.091 | 0.194 | 0.121 | 0.163 | 0.014 | 0.210 | 0.104 | 0.308 | 0.042 | 0.663 | 2.849 | 0.242  | 0.123  | 0.178 | 0.066 | 0.122 | 0.076 | 0.068 | 0.038 | 0.344 | 0.160 |
| undecane             | HC | 0.094  | 0.025 | 0.074                                                                                                                                                                                                                                                                                                                       | 0.031 | 0.097 | 0.026 | 0.116 | 0.014 | 0.103 | 0.030 | 0.143 | 0.015 | 0.116 | 0.064 | 0.037  | 0.014  | 0.025 | 0.012 | 0.026 | 0.014 | 0.007 | 0.007 | 0.038 | 0.011 |
| undecane             | HC | 0.351  | 0.135 | 0.312                                                                                                                                                                                                                                                                                                                       | 0.138 | 0.321 | 0.088 | 0.443 | 0.040 | 0.355 | 0.155 | 0.532 | 0.081 | 0.355 | 0.283 | 0.124  | 0.064  | 0.053 | 0.040 | 0.041 | 0.024 | 0.006 | 0.006 | 0.078 | 0.033 |
| undecane             | HC | 0.051  | 0.022 | 0.104                                                                                                                                                                                                                                                                                                                       | 0.049 | 0.044 | 0.021 | 0.065 | 0.004 | 0.071 | 0.041 | 0.127 | 0.022 | 0.206 | 0.139 | 0.075  | 0.031  | 0.006 | 0.011 | 0.011 | 0.000 | 0.017 | 0.017 | 0.059 | 0.028 |
| undecane             | HC | 0.074  | 0.018 | 0.051                                                                                                                                                                                                                                                                                                                       | 0.020 | 0.068 | 0.017 | 0.094 | 0.014 | 0.069 | 0.019 | 0.098 | 0.013 | 0.049 | 0.029 | 0.024  | 0.009  | 0.018 | 0.010 | 0.018 | 0.006 | 0.003 | 0.003 | 0.027 | 0.007 |
| undecane             | HC | 0.081  | 0.044 | 0.103                                                                                                                                                                                                                                                                                                                       | 0.050 | 0.044 | 0.019 | 0.060 | 0.004 | 0.082 | 0.037 | 0.123 | 0.013 | 0.294 | 0.688 | 0.067  | 0.028  | 0.026 | 0.015 | 0.046 | 0.016 | 0.016 | 0.013 | 0.068 | 0.032 |
| undecane             | HC | 0.115  | 0.104 | 0.091                                                                                                                                                                                                                                                                                                                       | 0.034 | 0.157 | 0.046 | 0.244 | 0.237 | 0.089 | 0.048 | 0.090 | 0.019 | 0.038 | 0.036 | 0.107  | 0.029  | 0.068 | 0.024 | 0.032 | 0.018 | 0.185 | 0.139 | 0.090 | 0.045 |
| undecane             | HC | 0.019  | 0.014 | 0.103                                                                                                                                                                                                                                                                                                                       | 0.053 | 0.039 | 0.025 | 0.008 | 0.008 | 0.042 | 0.026 | 0.076 | 0.019 | 0.134 | 0.124 | 0.025  | 0.022  | 0.005 | 0.004 | 0.002 | 0.001 | 0.001 | 0.006 | 0.002 | 0.001 |
| undecane             | HC | 0.000  | 0.000 | 0.006                                                                                                                                                                                                                                                                                                                       | 0.006 | 0.001 | 0.001 | 0.001 | 0.001 | 0.015 | 0.014 | 0.038 | 0.011 | 0.031 | 0.031 | 0.000  | 0.000  | 0.000 | 0.000 | 0.000 | 0.000 | 0.000 | 0.000 | 0.000 | 0.000 |
| undecane             | HC | 0.003  | 0.003 | 0.030                                                                                                                                                                                                                                                                                                                       | 0.013 | 0.017 | 0.010 | 0.027 | 0.016 | 0.119 | 0.033 | 0.101 | 0.030 | 0.821 | 0.821 | 0.012  | 0.012  | 0.010 | 0.000 | 0.000 | 0.000 | 0.012 | 0.012 | 0.012 | 0.002 |
| undecane             | HC | 0.008  | 0.008 | 0.000                                                                                                                                                                                                                                                                                                                       | 0.000 | 0.001 | 0.001 | 0.028 | 0.016 | 0.060 | 0.035 | 0.040 | 0.015 | 0.649 | 0.649 | 0.000  | 0.000  | 0.000 | 0.000 | 0.000 | 0.000 | 0.003 | 0.003 | 0.000 | 0.000 |
| undecane             | HC | 0.716  | 0.197 | 0.957                                                                                                                                                                                                                                                                                                                       | 0.203 | 0.361 | 0.186 | 0.303 | 0.182 | 0.843 | 0.354 | 1.802 | 0.879 | 0.396 | 0.290 | 0.688  | 0.315  | 0.501 | 0.311 | 0.010 | 0.010 | 0.560 | 0.521 | 3.355 | 2.265 |
| undecane             | MT | 0.549  | 0.252 | 0.451                                                                                                                                                                                                                                                                                                                       | 0.177 | 0.328 | 0.139 | 0.422 | 0.132 | 0.604 | 0.181 | 0.581 | 0.168 | 0.210 | 0.098 | 0.123  | 0.058  | 0.087 | 0.055 | 0.012 | 0.007 | 0.010 | 0.006 | 0.071 | 0.043 |
| undecane             | MT | 0.028  | 0.010 | 0.034                                                                                                                                                                                                                                                                                                                       | 0.007 | 0.023 | 0.003 | 0.031 | 0.005 | 0.044 | 0.015 | 0.054 | 0.013 | 0.026 | 0.011 | 0.021  | 0.006  | 0.019 | 0.010 | 0.010 | 0.004 | 0.017 | 0.046 | 0.031 | 0.086 |
| undecane             | MT | 0.213  | 0.063 | 0.159                                                                                                                                                                                                                                                                                                                       | 0.043 | 0.123 | 0.059 | 0.187 | 0.019 | 0.256 | 0.093 | 0.245 | 0.048 | 0.431 | 0.236 | 0.148  | 0.058  | 0.073 | 0.030 | 0.074 | 0.040 | 0.039 | 0.017 | 0.127 | 0.057 |
| undecane             | MT | 0.058  | 0.012 | 0.106                                                                                                                                                                                                                                                                                                                       | 0.021 | 0.047 | 0.007 | 0.088 | 0.007 | 0.092 | 0.012 | 0.102 | 0.016 | 0.132 | 0.099 | 0.074  | 0.011  | 0.046 | 0.020 | 0.048 | 0.019 | 0.027 | 0.036 | 0.058 | 0.016 |
| undecane             | MT | 0.000  | 0.000 | 0.000                                                                                                                                                                                                                                                                                                                       | 0.000 | 0.000 | 0.000 | 0.000 | 0.000 | 0.000 | 0.000 | 0.000 | 0.000 | 0.000 | 0.000 | 0.000  | 0.000  | 0.000 | 0.000 | 0.000 | 0.000 | 0.000 | 0.000 | 0.000 | 0.000 |
| undecane             | MT | 0.166  | 0.065 | 0.146                                                                                                                                                                                                                                                                                                                       | 0.048 | 0.123 | 0.038 | 0.176 | 0.046 | 0.129 | 0.053 | 0.177 | 0.034 | 0.145 | 0.117 | 0.073  | 0.034  | 0.049 | 0.027 | 0.028 | 0.016 | 0.002 | 0.002 | 0.044 | 0.027 |
| undecane             | MT | 0.016  | 0.006 | 0.031                                                                                                                                                                                                                                                                                                                       | 0.012 | 0.015 | 0.005 | 0.028 | 0.006 | 0.050 | 0.022 | 0.037 | 0.011 | 0.067 | 0.040 | 0.017  | 0.012  | 0.007 | 0.004 | 0.003 | 0.000 | 0.000 | 0.000 | 0.016 | 0.006 |
| undecane             | MT | 0.053  | 0.024 | 0.109                                                                                                                                                                                                                                                                                                                       | 0.077 | 0.060 | 0.028 | 0.081 | 0.014 | 0.082 | 0.037 | 0.112 | 0.031 | 0.113 | 0.084 | 0.074  | 0.071  | 0.007 | 0.005 | 0.008 | 0.005 | 0.001 | 0.001 | 0.016 | 0.010 |
| undecane             | MT | 0.013  | 0.006 | 0.077                                                                                                                                                                                                                                                                                                                       | 0.008 | 0.013 | 0.004 | 0.017 | 0.003 | 0.026 | 0.011 | 0.023 | 0.005 | 0.016 | 0.013 | 0.006  | 0.005  | 0.014 | 0.010 | 0.006 | 0.006 | 0.006 | 0.002 | 0.014 | 0.003 |
| undecane             | MT | 0.023  | 0.009 | 0.019                                                                                                                                                                                                                                                                                                                       | 0.009 | 0.029 | 0.009 | 0.046 | 0.012 | 0.025 | 0.011 | 0.033 | 0.005 | 0.084 | 0.076 | 0.037  | 0.017  | 0.014 | 0.004 | 0.015 | 0.008 | 0.007 | 0.003 | 0.053 | 0.013 |
| undecane             | MT | 0.026  | 0.013 | 0.023                                                                                                                                                                                                                                                                                                                       | 0.009 | 0.029 | 0.009 | 0.066 | 0.017 | 0.113 | 0.055 | 0.088 | 0.012 | 0.227 | 0.064 | 0.062  | 0.026  | 0.008 | 0.023 | 0.009 | 0.025 | 0.009 | 0.018 | 0.084 | 0.006 |
| undecane             | MT | 0.002  | 0.001 | 0.003                                                                                                                                                                                                                                                                                                                       | 0.001 | 0.002 | 0.001 | 0.004 | 0.000 | 0.004 | 0.001 | 0.006 | 0.001 | 0.012 | 0.008 | 0.002  | 0.001  | 0.002 | 0.000 | 0.002 | 0.001 | 0.001 | 0.000 | 0.003 | 0.000 |
| undecane             | MT | 0.003  | 0.001 | 0.004                                                                                                                                                                                                                                                                                                                       | 0.001 | 0.003 | 0.001 | 0.004 | 0.000 | 0.006 | 0.001 | 0.006 | 0.001 | 0.001 | 0.001 | 0.005  | 0.001  | 0.003 | 0.001 | 0.004 | 0.001 | 0.003 | 0.001 | 0.004 | 0.000 |
| undecane             | MT | 0.085  | 0.030 | 0.063                                                                                                                                                                                                                                                                                                                       | 0.096 | 0.023 | 0.049 | 0.017 | 0.079 | 0.015 | 0.044 | 0.022 | 0.305 | 0.140 | 0.112 | 0.047  | 0.061  | 0.085 | 0.038 | 0.025 | 0.027 | 0.016 | 0.017 | 0.066 | 0.027 |
| undecane             | MT | 0.035  | 0.027 | 0.019                                                                                                                                                                                                                                                                                                                       | 0.011 | 0.011 | 0.009 | 0.057 | 0.020 | 0.054 | 0.024 | 0.024 | 0.007 | 1.545 | 1.450 | 0.015  | 0.009  | 0.004 | 0.002 | 0.010 | 0.006 | 0.003 | 0.003 | 0.053 | 0.019 |
| undecane             | MT | 0.037  | 0.007 | 0.049                                                                                                                                                                                                                                                                                                                       | 0.006 | 0.034 | 0.004 | 0.080 | 0.016 | 0.067 | 0.020 | 0.072 | 0.005 | 0.090 | 0.042 | 0.031  | 0.005  | 0.024 | 0.007 | 0.051 | 0.028 | 0.025 | 0.008 | 0.049 | 0.013 |
| undecane             | MT | 0.009  | 0.004 | 0.112                                                                                                                                                                                                                                                                                                                       | 0.162 | 0.066 | 0.001 | 0.014 | 0.002 | 0.014 | 0.006 | 0.018 | 0.004 | 0.020 | 0.013 | 0.046  | 0.091  | 0.009 | 0.003 | 0.013 | 0.002 | 0.001 | 0.001 | 0.016 | 0.010 |
| undecane             | MT | 0.055  | 0.013 | 0.068                                                                                                                                                                                                                                                                                                                       | 0.014 | 0.044 | 0.012 | 0.048 | 0.005 | 0.051 | 0.013 | 0.069 | 0.008 | 0.467 | 0.393 | 0.053  | 0.017  | 0.029 | 0.008 | 0.040 | 0.01  |       |       |       |       |



| Emission rates (mean ± S.E., µg m <sup>-2</sup> h <sup>-1</sup> ) of individual compounds from mesocosms from Paha (P), tundra1 (T1), and tundra2 (T2) sites under control (C), warming (W), increased cloudiness (-P-AR), and warming + increased cloudiness (W-P-AR) treatments in mid-July of the second growing season. |        |       |         |         |        |       |       |       |        |         |       |       |       |        |        |       |       |       |       |
|-----------------------------------------------------------------------------------------------------------------------------------------------------------------------------------------------------------------------------------------------------------------------------------------------------------------------------|--------|-------|---------|---------|--------|-------|-------|-------|--------|---------|-------|-------|-------|--------|--------|-------|-------|-------|-------|
| Compounds                                                                                                                                                                                                                                                                                                                   | Groups | C     |         |         |        | W     |       |       |        | (-P-AR) |       |       |       | W-P-AR |        |       |       |       |       |
|                                                                                                                                                                                                                                                                                                                             |        | Mean  | S.E.    | T1      | T2     | Mean  | S.E.  | T1    | T2     | Mean    | S.E.  | T1    | T2    | Mean   | S.E.   | T1    | T2    |       |       |
| Compounds                                                                                                                                                                                                                                                                                                                   | Groups | Mean  | S.E.    | T1      | T2     | Mean  | S.E.  | T1    | T2     | Mean    | S.E.  | T1    | T2    | Mean   | S.E.   | T1    | T2    |       |       |
| indecane                                                                                                                                                                                                                                                                                                                    | HC     | 0.901 | 0.337   | 1.544   | 1.655  | 0.077 | 4.134 | 1.175 | 2.210  | 0.717   | 0.317 | 0.266 | 3.638 | 2.095  | 0.804  | 0.244 | 0.598 | 0.487 |       |
| cyclohexane                                                                                                                                                                                                                                                                                                                 | HC     | 0.000 | 0.000   | 0.000   | 0.000  | 0.000 | 0.000 | 0.000 | 0.000  | 0.000   | 0.000 | 0.000 | 0.000 | 0.000  | 0.000  | 0.000 | 0.000 | 0.000 |       |
| 2,2,3,3-tetramethylbutane                                                                                                                                                                                                                                                                                                   | HC     | 0.121 | 0.061   | 0.115   | 0.066  | 0.466 | 0.115 | 0.168 | 0.051  | 0.026   | 0.059 | 0.062 | 0.055 | 0.000  | 0.000  | 0.000 | 0.000 | 0.000 |       |
| heptane                                                                                                                                                                                                                                                                                                                     | HC     | 0.205 | 0.135   | 0.156   | 0.088  | 0.715 | 0.161 | 0.300 | 0.161  | 0.093   | 0.058 | 0.205 | 0.127 | 0.031  | 0.031  | 0.041 | 0.041 | 0.076 | 0.021 |
| toluene                                                                                                                                                                                                                                                                                                                     | HC     | 0.116 | 0.082   | 0.089   | 0.071  | 0.702 | 0.179 | 0.092 | 0.092  | 0.011   | 0.011 | 0.105 | 0.059 | 0.000  | 0.000  | 0.000 | 0.000 | 0.000 | 0.203 |
| 1,3-dimethylbenzene                                                                                                                                                                                                                                                                                                         | HC     | 0.000 | 0.000   | 0.000   | 0.000  | 0.000 | 0.000 | 0.000 | 0.000  | 0.000   | 0.000 | 0.000 | 0.000 | 0.000  | 0.000  | 0.000 | 0.000 | 0.000 | 0.000 |
| styrene                                                                                                                                                                                                                                                                                                                     | HC     | 0.019 | 0.019   | 0.000   | 0.000  | 0.000 | 0.163 | 0.089 | 0.572  | 0.352   | 0.387 | 0.387 | 0.377 | 0.185  | 0.185  | 0.281 | 0.281 | 0.000 | 0.030 |
| n-pentane                                                                                                                                                                                                                                                                                                                   | HC     | 0.006 | 0.006   | 0.007   | 0.005  | 0.146 | 0.044 | 0.028 | 0.028  | 0.000   | 0.000 | 0.004 | 0.003 | 0.000  | 0.000  | 0.000 | 0.000 | 0.000 | 0.014 |
| nonane                                                                                                                                                                                                                                                                                                                      | HC     | 0.000 | 0.000   | 0.000   | 0.000  | 0.000 | 0.000 | 0.000 | 0.000  | 0.000   | 0.000 | 0.000 | 0.000 | 0.000  | 0.000  | 0.000 | 0.000 | 0.000 | 0.000 |
| undecylidene HC 1                                                                                                                                                                                                                                                                                                           | HC     | 0.053 | 0.025   | 0.055   | 0.013  | 0.115 | 0.017 | 0.115 | 0.036  | 0.056   | 0.018 | 0.087 | 0.027 | 0.023  | 0.010  | 0.018 | 0.028 | 0.005 | 0.043 |
| undecylidene HC 2                                                                                                                                                                                                                                                                                                           | HC     | 0.047 | 0.025   | 0.042   | 0.013  | 0.101 | 0.021 | 0.060 | 0.038  | 0.020   | 0.009 | 0.050 | 0.019 | 0.000  | 0.000  | 0.000 | 0.000 | 0.000 | 0.037 |
| undecylidene HC 3                                                                                                                                                                                                                                                                                                           | HC     | 0.009 | 0.004   | 0.120   | 0.048  | 0.322 | 0.084 | 0.124 | 0.109  | 0.039   | 0.024 | 0.118 | 0.060 | 0.000  | 0.000  | 0.000 | 0.000 | 0.000 | 0.093 |
| decane                                                                                                                                                                                                                                                                                                                      | HC     | 0.000 | 0.000   | 0.000   | 0.000  | 0.000 | 0.000 | 0.000 | 0.000  | 0.000   | 0.000 | 0.000 | 0.000 | 0.000  | 0.000  | 0.000 | 0.000 | 0.000 | 0.000 |
| mesitylene                                                                                                                                                                                                                                                                                                                  | HC     | 0.010 | 0.005   | 0.005   | 0.003  | 0.015 | 0.005 | 0.009 | 0.009  | 0.001   | 0.001 | 0.013 | 0.007 | 0.000  | 0.000  | 0.000 | 0.000 | 0.000 | 0.008 |
| undecane                                                                                                                                                                                                                                                                                                                    | HC     | 0.000 | 0.000   | 0.000   | 0.000  | 0.000 | 0.000 | 0.000 | 0.000  | 0.000   | 0.000 | 0.000 | 0.000 | 0.000  | 0.000  | 0.000 | 0.000 | 0.000 | 0.000 |
| undecylidene HC 4                                                                                                                                                                                                                                                                                                           | HC     | 0.023 | 0.017   | 0.026   | 0.011  | 0.045 | 0.006 | 0.029 | 0.022  | 0.009   | 0.004 | 0.043 | 0.013 | 0.001  | 0.001  | 0.003 | 0.003 | 0.000 | 0.015 |
| dodecane                                                                                                                                                                                                                                                                                                                    | HC     | 0.000 | 0.000   | 0.000   | 0.000  | 0.000 | 0.000 | 0.000 | 0.000  | 0.000   | 0.000 | 0.000 | 0.000 | 0.000  | 0.000  | 0.000 | 0.000 | 0.000 | 0.000 |
| undecylidene HC 5                                                                                                                                                                                                                                                                                                           | HC     | 0.043 | 0.028   | 0.077   | 0.051  | 0.060 | 0.022 | 0.049 | 0.048  | 0.009   | 0.044 | 0.021 | 0.041 | 0.038  | 0.005  | 0.027 | 0.096 | 0.033 | 0.005 |
| undecane                                                                                                                                                                                                                                                                                                                    | HC     | 0.000 | 0.000   | 0.000   | 0.000  | 0.000 | 0.000 | 0.000 | 0.000  | 0.000   | 0.000 | 0.000 | 0.000 | 0.000  | 0.000  | 0.000 | 0.000 | 0.000 | 0.000 |
| tridecane                                                                                                                                                                                                                                                                                                                   | HC     | 0.031 | 0.031   | 0.000   | 0.000  | 0.110 | 0.063 | 0.065 | 0.065  | 0.188   | 0.099 | 0.053 | 0.054 | 0.478  | 0.478  | 0.120 | 0.120 | 0.000 | 0.000 |
| pentadecane                                                                                                                                                                                                                                                                                                                 | HC     | 0.000 | 0.000   | 0.001   | 0.001  | 0.039 | 0.022 | 0.044 | 0.043  | 0.156   | 0.080 | 0.057 | 0.023 | 0.031  | 0.031  | 0.008 | 0.008 | 0.000 | 0.000 |
| hexadecane                                                                                                                                                                                                                                                                                                                  | HC     | 0.000 | 0.000   | 0.000   | 0.000  | 0.000 | 0.000 | 0.000 | 0.000  | 0.007   | 0.010 | 0.010 | 0.046 | 0.046  | 0.003  | 0.003 | 0.128 | 0.128 | 0.000 |
| isoprene                                                                                                                                                                                                                                                                                                                    | ISO    | 4.063 | 3.824   | 1.347   | 0.491  | 1.266 | 0.432 | 8.417 | 5.836  | 1.123   | 0.343 | 1.747 | 2.533 | 1.113  | 0.113  | 0.094 | 0.094 | 0.076 | 0.437 |
| (cis-8-dimethylhepta-1,3,7-triene) (DMNT)                                                                                                                                                                                                                                                                                   | MT     | 0.017 | 0.007   | 0.025   | 0.008  | 0.032 | 0.014 | 0.473 | 0.375  | 0.234   | 0.099 | 0.071 | 0.034 | 0.005  | 0.005  | 0.020 | 0.018 | 0.002 | 0.207 |
| n-pentene                                                                                                                                                                                                                                                                                                                   | MT     | 0.005 | 0.005   | 0.275   | 0.120  | 0.769 | 0.084 | 0.224 | 0.240  | 0.178   | 0.233 | 0.171 | 0.000 | 0.000  | 0.000  | 0.006 | 0.006 | 0.000 | 0.174 |
| camphene                                                                                                                                                                                                                                                                                                                    | MT     | 0.093 | 0.035   | 0.098   | 0.025  | 0.217 | 0.029 | 0.159 | 0.075  | 0.075   | 0.020 | 0.106 | 0.069 | 0.025  | 0.025  | 0.008 | 0.005 | 0.004 | 0.002 |
| β-pinene                                                                                                                                                                                                                                                                                                                    | MT     | 0.038 | 0.031   | 0.121   | 0.036  | 0.192 | 0.037 | 0.144 | 0.128  | 0.174   | 0.060 | 0.130 | 0.060 | 0.026  | 0.026  | 0.009 | 0.009 | 0.000 | 0.000 |
| α-pinene                                                                                                                                                                                                                                                                                                                    | MT     | 0.005 | 0.004   | 0.094   | 0.039  | 0.038 | 0.017 | 0.093 | 0.069  | 0.098   | 0.019 | 0.062 | 0.018 | 0.003  | 0.003  | 0.054 | 0.053 | 0.001 | 0.001 |
| α-phellandrene                                                                                                                                                                                                                                                                                                              | MT     | 0.004 | 0.002   | 0.010   | 0.003  | 0.016 | 0.003 | 0.015 | 0.005  | 0.014   | 0.002 | 0.012 | 0.004 | 0.003  | 0.002  | 0.006 | 0.003 | 0.001 | 0.001 |
| 3-carene                                                                                                                                                                                                                                                                                                                    | MT     | 0.014 | 0.014   | 0.004   | 0.004  | 0.133 | 0.025 | 0.038 | 0.038  | 0.000   | 0.043 | 0.043 | 0.000 | 0.000  | 0.000  | 0.000 | 0.000 | 0.000 | 0.024 |
| δ-pinene                                                                                                                                                                                                                                                                                                                    | MT     | 0.067 | 0.044   | 0.126   | 0.037  | 0.153 | 0.045 | 0.276 | 0.086  | 0.255   | 0.070 | 0.213 | 0.061 | 0.000  | 0.000  | 0.030 | 0.018 | 0.000 | 0.051 |
| trans-α-ocimene                                                                                                                                                                                                                                                                                                             | MT     | 0.303 | 0.179   | 0.275   | 0.196  | 0.229 | 0.119 | 0.833 | 0.107  | 0.635   | 0.268 | 0.494 | 0.173 | 0.037  | 0.012  | 0.128 | 0.074 | 0.053 | 0.333 |
| undecylidene MT 1                                                                                                                                                                                                                                                                                                           | MT     | 0.000 | 0.000   | 0.094   | 0.051  | 0.206 | 0.112 | 0.147 | 0.063  | 0.201   | 0.074 | 0.137 | 0.089 | 0.000  | 0.000  | 0.093 | 0.051 | 0.049 | 0.049 |
| γ-terpinene                                                                                                                                                                                                                                                                                                                 | MT     | 0.013 | 0.008   | 0.020   | 0.007  | 0.029 | 0.006 | 0.153 | 0.099  | 0.065   | 0.017 | 0.065 | 0.029 | 0.008  | 0.008  | 0.013 | 0.006 | 0.001 | 0.001 |
| α-terpinolene                                                                                                                                                                                                                                                                                                               | MT     | 0.009 | 0.005   | 0.023   | 0.006  | 0.024 | 0.004 | 0.040 | 0.019  | 0.058   | 0.007 | 0.041 | 0.011 | 0.004  | 0.002  | 0.017 | 0.013 | 0.003 | 0.017 |
| allo-ocimene                                                                                                                                                                                                                                                                                                                | MT     | 0.000 | 0.000   | 0.004   | 0.002  | 0.010 | 0.006 | 0.023 | 0.001  | 0.009   | 0.015 | 0.004 | 0.004 | 0.000  | 0.000  | 0.002 | 0.002 | 0.001 | 0.005 |
| undecylidene MT 2                                                                                                                                                                                                                                                                                                           | MT     | 0.006 | 0.003   | 0.011   | 0.002  | 0.017 | 0.002 | 0.014 | 0.004  | 0.018   | 0.004 | 0.012 | 0.006 | 0.003  | 0.002  | 0.006 | 0.003 | 0.001 | 0.002 |
| eucalyptol                                                                                                                                                                                                                                                                                                                  | sMT    | 0.119 | 0.086   | 0.371   | 0.098  | 0.391 | 0.114 | 0.602 | 0.095  | 0.572   | 0.252 | 0.555 | 0.169 | 0.003  | 0.003  | 0.130 | 0.073 | 0.014 | 0.209 |
| limonol                                                                                                                                                                                                                                                                                                                     | sMT    | 0.149 | 0.061   | 0.206   | 0.029  | 0.277 | 0.103 | 1.973 | 1.361  | 1.931   | 0.916 | 0.441 | 0.185 | 0.055  | 0.055  | 0.138 | 0.046 | 0.037 | 0.020 |
| (+)-2-borneone                                                                                                                                                                                                                                                                                                              | sMT    | 0.033 | 0.014   | 0.050   | 0.005  | 0.060 | 0.008 | 0.071 | 0.010  | 0.060   | 0.009 | 0.073 | 0.020 | 0.023  | 0.011  | 0.033 | 0.016 | 0.008 | 0.008 |
| endo-borneol                                                                                                                                                                                                                                                                                                                | sMT    | 0.095 | 0.022   | 0.109   | 0.011  | 0.125 | 0.036 | 0.212 | 0.039  | 0.085   | 0.188 | 0.056 | 0.101 | 0.044  | 0.125  | 0.036 | 0.066 | 0.030 | 0.133 |
| terpinen-4-ol                                                                                                                                                                                                                                                                                                               | sMT    | 0.020 | 0.007   | 0.052   | 0.004  | 0.042 | 0.009 | 0.050 | 0.013  | 0.061   | 0.016 | 0.054 | 0.018 | 0.039  | 0.019  | 0.035 | 0.014 | 0.013 |       |
| terpinolol                                                                                                                                                                                                                                                                                                                  | sMT    | 0.004 | 0.004   | 0.040   | 0.007  | 0.025 | 0.005 | 0.038 | 0.021  | 0.131   | 0.050 | 0.044 | 0.013 | 0.025  | 0.014  | 0.038 | 0.008 | 0.008 |       |
| bornyl acetate                                                                                                                                                                                                                                                                                                              | sMT    | 0.002 | 0.002   | 0.005   | 0.002  | 0.015 | 0.005 | 0.017 | 0.009  | 0.021   | 0.011 | 0.024 | 0.009 | 0.015  | 0.015  | 0.015 | 0.003 | 0.003 |       |
| geranyl acetone                                                                                                                                                                                                                                                                                                             | sMT    | 0.000 | 0.000   | 0.000   | 0.000  | 0.000 | 0.000 | 0.000 | 0.000  | 0.000   | 0.000 | 0.000 | 0.000 | 0.000  | 0.000  | 0.000 | 0.000 | 0.000 |       |
| carophyllene oxide                                                                                                                                                                                                                                                                                                          | sOT    | 0.002 | 0.002   | 0.023   | 0.012  | 0.031 | 0.023 | 0.040 | 0.021  | 0.113   | 0.077 | 0.073 | 0.024 | 0.311  | 0.267  | 0.118 | 0.117 | 0.476 |       |
| undecylidene VOC 1                                                                                                                                                                                                                                                                                                          | other  | 0.000 | 0.000   | 0.000   | 0.000  | 0.000 | 0.000 | 0.000 | 0.000  | 0.000   | 0.000 | 0.000 | 0.000 | 0.000  | 0.000  | 0.000 | 0.000 | 0.000 |       |
| undecylidene VOC 2                                                                                                                                                                                                                                                                                                          | other  | 0.001 | 0.000   | 0.002   | 0.001  | 0.098 | 0.091 | 0.001 | 0.000  | 0.000   | 0.000 | 0.000 | 0.000 | 0.000  | 0.000  | 0.000 | 0.000 | 0.000 |       |
| cis-3-hexenyl acetate                                                                                                                                                                                                                                                                                                       | OVOC   | 3.009 | 113.658 | 102.738 | 14.642 | 4.235 | 8.963 | 2.870 | 11.669 | 36.845  | 8.863 | 4.508 | 3.718 | 86.305 | 79.689 | 0.345 | 0.345 | 3.336 |       |
| cis-3-hexenol                                                                                                                                                                                                                                                                                                               | OVOC   | 0.962 | 0.505   | 3.932   | 2.084  | 2.518 | 1.801 | 0.962 | 0.226  | 1.438   | 0.528 | 0.544 | 0.680 | 0.213  | 0.163  | 5.126 | 2.877 | 0.747 |       |
| trans-2-hexenol                                                                                                                                                                                                                                                                                                             | OVOC   | 0.026 | 0.024   | 0.361   | 0.208  | 0.977 | 0.171 | 0.000 | 0.000  | 0.000   | 0.000 | 0.000 | 0.000 | 0.000  | 0.000  | 0.349 | 0.209 | 0.021 |       |
| 1-hexanol                                                                                                                                                                                                                                                                                                                   | OVOC   | 0.146 | 0.014   | 0.158   | 0.035  | 0.160 | 0.044 | 0.235 | 0.032  | 0.172   | 0.028 | 0.183 | 0.058 | 0.097  | 0.042  | 0.163 | 0.043 | 0.045 |       |
| cis-2-hexenyl acetate                                                                                                                                                                                                                                                                                                       | OVOC   | 0.190 | 0.133   | 5.802   | 2.864  | 2.637 | 2.019 | 1.803 | 0.300  | 2.829   | 1.173 | 1.516 | 0.741 | 0.354  | 0.354  | 5.815 | 2.125 | 0.591 |       |
| cis-3-hexenyl isobutyrate                                                                                                                                                                                                                                                                                                   | OVOC   | 0.318 | 0.201   | 0.090   | 0.058  | 0.195 | 0.129 | 0.075 | 0.029  | 0.094   | 0.044 | 0.127 | 0.065 | 0.019  | 0.013  | 0.068 | 0.027 | 0.019 |       |

| Compounds                            | Groups | C      |       |       |       |       |       |       |       |        |        |       |       | W     |       |       |       |       |       |       |       |       |       |       |       | I-PAR |       |       |       |       |       |       |  |  |    |  |  | W-PAR |  |  |  |  |  |  |  |  |  |  |  |
|--------------------------------------|--------|--------|-------|-------|-------|-------|-------|-------|-------|--------|--------|-------|-------|-------|-------|-------|-------|-------|-------|-------|-------|-------|-------|-------|-------|-------|-------|-------|-------|-------|-------|-------|--|--|----|--|--|-------|--|--|--|--|--|--|--|--|--|--|--|
|                                      |        | Mean   |       |       | S.E.  |       |       | T1    |       |        | T2     |       |       | Mean  |       |       | S.E.  |       |       | T1    |       |       | T2    |       |       | Mean  |       |       | S.E.  |       |       | T1    |  |  | T2 |  |  |       |  |  |  |  |  |  |  |  |  |  |  |
|                                      |        | Mean   | S.E.  | T1    | Mean  | S.E.  | T2    | Mean  | S.E.  | T1     | Mean   | S.E.  | T2    | Mean  | S.E.  | T1    | Mean  | S.E.  | T2    | Mean  | S.E.  | T1    | Mean  | S.E.  | T2    | Mean  | S.E.  | T1    | Mean  | S.E.  | T2    |       |  |  |    |  |  |       |  |  |  |  |  |  |  |  |  |  |  |
| n-hexane                             | HC     | 15.130 | 1.201 | 1.405 | 0.663 | 0.241 | 0.241 | 0.000 | 0.000 | 24.450 | 23.275 | 0.000 | 0.000 | 1.522 | 1.522 | 0.424 | 0.424 | 1.181 | 1.181 | 0.000 | 0.000 | 0.247 | 0.247 | 0.975 | 0.975 | 0.000 | 0.000 | 0.000 | 0.000 | 0.000 | 0.000 |       |  |  |    |  |  |       |  |  |  |  |  |  |  |  |  |  |  |
| cyclohexane                          | HC     | 0.008  | 0.000 | 0.000 | 0.000 | 0.006 | 0.006 | 0.429 | 0.288 | 0.290  | 0.212  | 0.998 | 0.037 | 0.000 | 0.000 | 0.000 | 0.000 | 0.000 | 0.000 | 0.000 | 0.000 | 0.000 | 0.000 | 0.000 | 0.000 | 0.000 | 0.000 | 0.000 | 0.000 | 0.000 | 0.000 |       |  |  |    |  |  |       |  |  |  |  |  |  |  |  |  |  |  |
| 2,2,3,3-tetramethylbutane            | HC     | 0.000  | 0.000 | 0.185 | 0.184 | 0.001 | 0.000 | 0.000 | 0.000 | 0.000  | 0.002  | 0.000 | 0.000 | 0.000 | 0.000 | 0.000 | 0.000 | 0.000 | 0.000 | 0.000 | 0.000 | 0.000 | 0.000 | 0.000 | 0.000 | 0.000 | 0.000 | 0.000 | 0.000 | 0.000 | 0.000 |       |  |  |    |  |  |       |  |  |  |  |  |  |  |  |  |  |  |
| indane                               | HC     | 0.000  | 0.000 | 0.000 | 0.000 | 0.000 | 0.000 | 0.000 | 0.000 | 0.000  | 0.000  | 0.000 | 0.000 | 0.000 | 0.000 | 0.000 | 0.000 | 0.000 | 0.000 | 0.000 | 0.000 | 0.000 | 0.000 | 0.000 | 0.000 | 0.000 | 0.000 | 0.000 | 0.000 | 0.000 | 0.000 |       |  |  |    |  |  |       |  |  |  |  |  |  |  |  |  |  |  |
| 1,1-dimethylbenzene                  | HC     | 0.831  | 0.831 | 0.016 | 0.016 | 0.064 | 0.064 | 0.000 | 0.000 | 0.000  | 0.000  | 0.000 | 0.000 | 0.000 | 0.000 | 0.000 | 0.000 | 0.000 | 0.000 | 0.000 | 0.000 | 0.000 | 0.000 | 0.000 | 0.000 | 0.000 | 0.000 | 0.000 | 0.000 | 0.000 | 0.000 | 0.000 |  |  |    |  |  |       |  |  |  |  |  |  |  |  |  |  |  |
| p-xylene                             | HC     | 0.907  | 0.907 | 0.024 | 0.024 | 0.074 | 0.074 | 0.000 | 0.000 | 0.000  | 0.000  | 0.000 | 0.000 | 0.000 | 0.000 | 0.000 | 0.000 | 0.000 | 0.000 | 0.000 | 0.000 | 0.000 | 0.000 | 0.000 | 0.000 | 0.000 | 0.000 | 0.000 | 0.000 | 0.000 | 0.000 |       |  |  |    |  |  |       |  |  |  |  |  |  |  |  |  |  |  |
| toluene                              | HC     | 0.000  | 0.000 | 0.000 | 0.000 | 0.000 | 0.000 | 0.000 | 0.000 | 0.000  | 0.000  | 0.000 | 0.000 | 0.000 | 0.000 | 0.000 | 0.000 | 0.000 | 0.000 | 0.000 | 0.000 | 0.000 | 0.000 | 0.000 | 0.000 | 0.000 | 0.000 | 0.000 | 0.000 | 0.000 | 0.000 |       |  |  |    |  |  |       |  |  |  |  |  |  |  |  |  |  |  |
| undecylated HC 1                     | HC     | 0.018  | 0.018 | 0.000 | 0.000 | 0.000 | 0.000 | 0.000 | 0.000 | 0.000  | 0.000  | 0.000 | 0.000 | 0.000 | 0.000 | 0.000 | 0.000 | 0.000 | 0.000 | 0.000 | 0.000 | 0.000 | 0.000 | 0.000 | 0.000 | 0.000 | 0.000 | 0.000 | 0.000 | 0.000 | 0.000 |       |  |  |    |  |  |       |  |  |  |  |  |  |  |  |  |  |  |
| undecylated HC 2                     | HC     | 0.005  | 0.005 | 0.000 | 0.000 | 0.000 | 0.000 | 0.000 | 0.000 | 0.000  | 0.000  | 0.000 | 0.000 | 0.000 | 0.000 | 0.000 | 0.000 | 0.000 | 0.000 | 0.000 | 0.000 | 0.000 | 0.000 | 0.000 | 0.000 | 0.000 | 0.000 | 0.000 | 0.000 | 0.000 | 0.000 |       |  |  |    |  |  |       |  |  |  |  |  |  |  |  |  |  |  |
| undecylated HC 3                     | HC     | 0.028  | 0.028 | 0.001 | 0.001 | 0.000 | 0.000 | 0.000 | 0.000 | 0.000  | 0.000  | 0.000 | 0.000 | 0.000 | 0.000 | 0.000 | 0.000 | 0.000 | 0.000 | 0.000 | 0.000 | 0.000 | 0.000 | 0.000 | 0.000 | 0.000 | 0.000 | 0.000 | 0.000 | 0.000 | 0.000 |       |  |  |    |  |  |       |  |  |  |  |  |  |  |  |  |  |  |
| decane                               | HC     | 0.000  | 0.000 | 0.000 | 0.000 | 0.000 | 0.000 | 0.000 | 0.000 | 0.000  | 0.000  | 0.000 | 0.000 | 0.000 | 0.000 | 0.000 | 0.000 | 0.000 | 0.000 | 0.000 | 0.000 | 0.000 | 0.000 | 0.000 | 0.000 | 0.000 | 0.000 | 0.000 | 0.000 | 0.000 | 0.000 |       |  |  |    |  |  |       |  |  |  |  |  |  |  |  |  |  |  |
| methylenes                           | HC     | 0.005  | 0.005 | 0.000 | 0.000 | 0.000 | 0.000 | 0.000 | 0.000 | 0.000  | 0.000  | 0.000 | 0.000 | 0.000 | 0.000 | 0.000 | 0.000 | 0.000 | 0.000 | 0.000 | 0.000 | 0.000 | 0.000 | 0.000 | 0.000 | 0.000 | 0.000 | 0.000 | 0.000 | 0.000 | 0.000 |       |  |  |    |  |  |       |  |  |  |  |  |  |  |  |  |  |  |
| benzene, (1,1-dimethylpropyl)-       | HC     | 0.004  | 0.004 | 0.549 | 0.549 | 0.624 | 0.588 | 0.000 | 0.000 | 0.000  | 0.000  | 0.000 | 0.000 | 0.000 | 0.000 | 0.000 | 0.000 | 0.000 | 0.000 | 0.000 | 0.000 | 0.000 | 0.000 | 0.000 | 0.000 | 0.000 | 0.000 | 0.000 | 0.000 | 0.000 | 0.000 |       |  |  |    |  |  |       |  |  |  |  |  |  |  |  |  |  |  |
| undecane                             | HC     | 0.000  | 0.000 | 0.000 | 0.000 | 0.000 | 0.000 | 0.000 | 0.000 | 0.000  | 0.000  | 0.000 | 0.000 | 0.000 | 0.000 | 0.000 | 0.000 | 0.000 | 0.000 | 0.000 | 0.000 | 0.000 | 0.000 | 0.000 | 0.000 | 0.000 | 0.000 | 0.000 | 0.000 | 0.000 | 0.000 |       |  |  |    |  |  |       |  |  |  |  |  |  |  |  |  |  |  |
| undecylated HC 4                     | HC     | 0.003  | 0.003 | 0.000 | 0.000 | 0.000 | 0.000 | 0.000 | 0.000 | 0.000  | 0.000  | 0.000 | 0.000 | 0.000 | 0.000 | 0.000 | 0.000 | 0.000 | 0.000 | 0.000 | 0.000 | 0.000 | 0.000 | 0.000 | 0.000 | 0.000 | 0.000 | 0.000 | 0.000 | 0.000 | 0.000 |       |  |  |    |  |  |       |  |  |  |  |  |  |  |  |  |  |  |
| decadecane                           | HC     | 0.000  | 0.000 | 0.000 | 0.000 | 0.000 | 0.000 | 0.000 | 0.000 | 0.000  | 0.000  | 0.000 | 0.000 | 0.000 | 0.000 | 0.000 | 0.000 | 0.000 | 0.000 | 0.000 | 0.000 | 0.000 | 0.000 | 0.000 | 0.000 | 0.000 | 0.000 | 0.000 | 0.000 | 0.000 | 0.000 |       |  |  |    |  |  |       |  |  |  |  |  |  |  |  |  |  |  |
| undecylated HC 5                     | HC     | 0.008  | 0.008 | 0.010 | 0.010 | 0.005 | 0.008 | 0.006 | 0.001 | 0.000  | 0.004  | 0.001 | 0.001 | 0.001 | 0.001 | 0.001 | 0.001 | 0.001 | 0.001 | 0.001 | 0.001 | 0.001 | 0.001 | 0.001 | 0.001 | 0.001 | 0.001 | 0.001 | 0.001 | 0.001 | 0.001 |       |  |  |    |  |  |       |  |  |  |  |  |  |  |  |  |  |  |
| undecylated HC 6                     | HC     | 0.005  | 0.005 | 0.005 | 0.005 | 0.003 | 0.005 | 0.003 | 0.000 | 0.000  | 0.002  | 0.000 | 0.001 | 0.000 | 0.001 | 0.000 | 0.001 | 0.000 | 0.001 | 0.000 | 0.001 | 0.000 | 0.001 | 0.000 | 0.001 | 0.000 | 0.001 | 0.000 | 0.001 | 0.000 | 0.001 |       |  |  |    |  |  |       |  |  |  |  |  |  |  |  |  |  |  |
| undecylated HC 7                     | HC     | 0.000  | 0.000 | 0.000 | 0.000 | 0.000 | 0.000 | 0.000 | 0.000 | 0.000  | 0.000  | 0.000 | 0.000 | 0.000 | 0.000 | 0.000 | 0.000 | 0.000 | 0.000 | 0.000 | 0.000 | 0.000 | 0.000 | 0.000 | 0.000 | 0.000 | 0.000 | 0.000 | 0.000 | 0.000 | 0.000 |       |  |  |    |  |  |       |  |  |  |  |  |  |  |  |  |  |  |
| tridecane                            | HC     | 0.002  | 0.002 | 0.180 | 0.180 | 0.206 | 0.173 | 0.000 | 0.000 | 0.000  | 0.000  | 0.000 | 0.000 | 0.000 | 0.000 | 0.000 | 0.000 | 0.000 | 0.000 | 0.000 | 0.000 | 0.000 | 0.000 | 0.000 | 0.000 | 0.000 | 0.000 | 0.000 | 0.000 | 0.000 | 0.000 |       |  |  |    |  |  |       |  |  |  |  |  |  |  |  |  |  |  |
| tetradecane                          | HC     | 0.000  | 0.000 | 0.000 | 0.000 | 0.000 | 0.000 | 0.000 | 0.000 | 0.000  | 0.000  | 0.000 | 0.000 | 0.000 | 0.000 | 0.000 | 0.000 | 0.000 | 0.000 | 0.000 | 0.000 | 0.000 | 0.000 | 0.000 | 0.000 | 0.000 | 0.000 | 0.000 | 0.000 | 0.000 | 0.000 |       |  |  |    |  |  |       |  |  |  |  |  |  |  |  |  |  |  |
| pentadecane                          | HC     | 0.000  | 0.000 | 0.000 | 0.000 | 0.000 | 0.000 | 0.000 | 0.000 | 0.000  | 0.000  | 0.000 | 0.000 | 0.000 | 0.000 | 0.000 | 0.000 | 0.000 | 0.000 | 0.000 | 0.000 | 0.000 | 0.000 | 0.000 | 0.000 | 0.000 | 0.000 | 0.000 | 0.000 | 0.000 | 0.000 |       |  |  |    |  |  |       |  |  |  |  |  |  |  |  |  |  |  |
| hexadecane                           | HC     | 0.000  | 0.000 | 0.000 | 0.000 | 0.000 | 0.000 | 0.000 | 0.000 | 0.000  | 0.000  | 0.000 | 0.000 | 0.000 | 0.000 | 0.000 | 0.000 | 0.000 | 0.000 | 0.000 | 0.000 | 0.000 | 0.000 | 0.000 | 0.000 | 0.000 | 0.000 | 0.000 | 0.000 | 0.000 | 0.000 |       |  |  |    |  |  |       |  |  |  |  |  |  |  |  |  |  |  |
| isoprene                             | ISO    | 0.450  | 0.450 | 0.238 | 0.238 | 0.000 | 0.000 | 4.509 | 2.914 | 0.019  | 0.019  | 0.000 | 0.000 | 0.010 | 0.010 | 0.243 | 0.191 | 0.284 | 0.284 | 0.321 | 0.321 | 2.380 | 2.380 | 0.000 | 0.000 | 0.000 | 0.000 | 0.000 | 0.000 | 0.000 | 0.000 |       |  |  |    |  |  |       |  |  |  |  |  |  |  |  |  |  |  |
| 1-(3,4-dimethyl-1,3,5-triene) (DMNT) | MT     | 0.013  | 0.013 | 0.005 | 0.007 | 0.024 | 0.110 | 0.102 | 0.274 | 0.486  | 0.115  | 0.054 | 0.032 | 0.019 | 0.000 | 0.000 | 0.000 | 0.000 | 0.000 | 0.000 | 0.000 | 0.000 | 0.000 | 0.000 | 0.000 | 0.000 | 0.000 | 0.000 | 0.000 | 0.000 | 0.000 |       |  |  |    |  |  |       |  |  |  |  |  |  |  |  |  |  |  |
| camphene                             | MT     | 0.012  | 0.012 | 0.005 | 0.004 | 0.021 | 0.003 | 0.001 | 0.007 | 0.006  | 0.003  | 0.002 | 0.003 | 0.002 | 0.004 | 0.020 | 0.023 | 0.019 | 0.012 | 0.045 | 0.013 | 0.009 | 0.009 | 0.023 | 0.023 | 0.027 | 0.027 | 0.017 | 0.017 | 0.017 | 0.017 |       |  |  |    |  |  |       |  |  |  |  |  |  |  |  |  |  |  |
| β-pinene                             | MT     | 0.036  | 0.036 | 0.000 | 0.000 | 0.000 | 0.000 | 0.000 | 0.000 | 0.000  | 0.000  | 0.000 | 0.000 | 0.000 | 0.000 | 0.000 | 0.000 | 0.000 | 0.000 | 0.000 | 0.000 | 0.000 | 0.000 | 0.000 | 0.000 | 0.000 | 0.000 | 0.000 | 0.000 | 0.000 | 0.000 |       |  |  |    |  |  |       |  |  |  |  |  |  |  |  |  |  |  |
| α-pinene                             | MT     | 0.035  | 0.035 | 0.007 | 0.009 | 0.009 | 0.007 | 0.029 | 0.021 | 0.010  | 0.006  | 0.000 | 0.000 | 0.000 | 0.001 | 0.029 | 0.015 | 0.005 | 0.016 | 0.009 | 0.008 | 0.005 | 0.005 | 0.005 | 0.005 | 0.005 | 0.005 | 0.005 | 0.005 | 0.005 | 0.005 |       |  |  |    |  |  |       |  |  |  |  |  |  |  |  |  |  |  |
| α-phellandrene                       | MT     | 0.001  | 0.001 | 0.000 | 0.000 | 0.000 | 0.000 | 0.002 | 0.001 | 0.000  | 0.000  | 0.000 | 0.000 | 0.000 | 0.001 | 0.002 | 0.001 | 0.001 | 0.000 | 0.000 | 0.000 | 0.000 | 0.000 | 0.000 | 0.000 | 0.000 | 0.000 | 0.000 | 0.000 | 0.000 | 0.000 |       |  |  |    |  |  |       |  |  |  |  |  |  |  |  |  |  |  |
| 2-carene                             | MT     | 0.000  | 0.000 | 0.000 | 0.000 | 0.000 | 0.000 | 0.000 | 0.000 | 0.000  | 0.000  | 0.000 | 0.000 | 0.000 | 0.000 | 0.000 | 0.000 | 0.000 | 0.000 | 0.000 | 0.000 | 0.000 | 0.000 | 0.000 | 0.000 | 0.000 | 0.000 | 0.000 | 0.000 | 0.000 | 0.000 |       |  |  |    |  |  |       |  |  |  |  |  |  |  |  |  |  |  |
| 4-terpinene                          | MT     | 0.022  | 0.022 | 0.016 | 0.017 | 0.010 | 0.020 | 0.001 | 0.013 | 0.011  | 0.024  | 0.018 | 0.001 | 0.001 | 0.008 | 0.006 | 0.010 | 0.005 | 0.023 | 0.022 | 0.003 | 0.002 | 0.003 | 0.002 | 0.003 | 0.002 | 0.003 | 0.002 | 0.003 | 0.002 | 0.003 |       |  |  |    |  |  |       |  |  |  |  |  |  |  |  |  |  |  |
| trans-α-ocimene                      | MT     | 0.115  | 0.115 | 0.046 | 0.075 | 0.040 | 0.129 | 0.083 | 0.454 | 0.245  | 0.079  | 0.023 | 0.036 | 0.014 | 0.060 | 0.019 | 0.054 | 0.029 | 0.071 | 0.041 | 0.125 | 0.162 | 0.082 | 0.051 | 0.102 | 0.082 | 0.051 | 0.102 | 0.082 | 0.051 | 0.102 |       |  |  |    |  |  |       |  |  |  |  |  |  |  |  |  |  |  |
| undecylated MT 1                     | MT     | 0.022  | 0.022 | 0.011 | 0.025 | 0.015 | 0.034 | 0.026 | 0.131 | 0.156  | 0.067  | 0.025 | 0.017 | 0.009 | 0.007 | 0.005 | 0.012 | 0.009 | 0.007 | 0.005 | 0.011 | 0.005 | 0.014 | 0.005 | 0.011 | 0.005 | 0.014 | 0.005 | 0.011 | 0.005 | 0.011 |       |  |  |    |  |  |       |  |  |  |  |  |  |  |  |  |  |  |
| α-terpinene                          | MT     | 0.015  | 0.015 | 0.007 | 0.017 | 0.014 | 0.014 | 0.011 | 0.181 | 0.091  | 0.006  | 0.004 | 0.004 | 0.00  |       |       |       |       |       |       |       |       |       |       |       |       |       |       |       |       |       |       |  |  |    |  |  |       |  |  |  |  |  |  |  |  |  |  |  |

| Emission rates (mean ± S.E., µg m <sup>-2</sup> h <sup>-1</sup> ) of individual compounds from mesocosms from Palsa (P), tundra1 (T1), and tundra2 (T2) sites under control (C), warming (W), increased cloudiness (P-AR), and warming + increased cloudiness (W-AR) treatments in mid-August of the second growing season. |        |        |        |       |       |       |       |       |       |       |       |       |       |       |       |       |       |       |       |        |       |       |       |       |       |       |
|-----------------------------------------------------------------------------------------------------------------------------------------------------------------------------------------------------------------------------------------------------------------------------------------------------------------------------|--------|--------|--------|-------|-------|-------|-------|-------|-------|-------|-------|-------|-------|-------|-------|-------|-------|-------|-------|--------|-------|-------|-------|-------|-------|-------|
| Compounds                                                                                                                                                                                                                                                                                                                   | Groups | C      |        |       |       |       | W     |       |       |       |       | P-AR  |       |       |       |       | W-AR  |       |       |        |       |       |       |       |       |       |
|                                                                                                                                                                                                                                                                                                                             |        | Mean   | S.E.   | T1    | T2    | P     | Mean  | S.E.  | T1    | T2    | P     | Mean  | S.E.  | T1    | T2    | P     | Mean  | S.E.  | T1    | T2     | P     |       |       |       |       |       |
| Compounds                                                                                                                                                                                                                                                                                                                   |        | Mean   | S.E.   | Mean  | S.E.  | Mean  | S.E.  | Mean  | S.E.  | Mean  | S.E.  | Mean  | S.E.  | Mean  | S.E.  | Mean  | S.E.  | Mean  | S.E.  | Mean   | S.E.  | Mean  | S.E.  |       |       |       |
| n-hexane                                                                                                                                                                                                                                                                                                                    | HC     | 2.443  | 1.543  | 2.437 | 1.535 | 6.984 | 3.077 | 1.891 | 1.139 | 3.409 | 2.619 | 5.714 | 4.892 | 1.208 | 8.859 | 2.663 | 1.726 | 7.956 | 3.733 | 12.002 | 7.886 | 3.371 | 2.076 | 2.241 | 1.764 |       |
| 2,3,3-tetramethylbutane                                                                                                                                                                                                                                                                                                     | HC     | 0.000  | 0.000  | 0.004 | 0.003 | 0.008 | 0.002 | 0.070 | 0.049 | 0.008 | 0.003 | 0.019 | 0.007 | 0.021 | 0.007 | 0.014 | 0.007 | 0.008 | 0.029 | 0.017  | 0.006 | 0.005 | 0.005 | 0.003 | 0.002 |       |
| toluene                                                                                                                                                                                                                                                                                                                     | HC     | 0.000  | 0.000  | 0.033 | 0.020 | 0.054 | 0.034 | 0.462 | 0.351 | 0.166 | 0.103 | 0.663 | 0.309 | 0.265 | 0.062 | 0.216 | 0.104 | 0.115 | 0.055 | 0.000  | 0.000 | 0.000 | 0.000 | 0.000 | 0.000 | 0.000 |
| octane                                                                                                                                                                                                                                                                                                                      | HC     | 0.024  | 0.015  | 0.100 | 0.041 | 0.166 | 0.067 | 0.161 | 0.073 | 0.026 | 0.023 | 0.280 | 0.200 | 0.062 | 0.033 | 0.137 | 0.127 | 0.123 | 0.110 | 0.159  | 0.090 | 0.053 | 0.023 | 0.020 | 0.020 |       |
| ethylbenzene                                                                                                                                                                                                                                                                                                                | HC     | 0.000  | 0.000  | 0.005 | 0.005 | 0.000 | 0.000 | 0.081 | 0.061 | 0.039 | 0.024 | 0.101 | 0.058 | 0.047 | 0.016 | 0.037 | 0.021 | 0.017 | 0.009 | 0.000  | 0.000 | 0.000 | 0.000 | 0.000 | 0.000 |       |
| 1,3-dimethylbenzene                                                                                                                                                                                                                                                                                                         | HC     | 0.000  | 0.000  | 0.010 | 0.010 | 0.000 | 0.000 | 0.157 | 0.116 | 0.071 | 0.042 | 0.200 | 0.120 | 0.083 | 0.025 | 0.064 | 0.039 | 0.039 | 0.020 | 0.000  | 0.000 | 0.000 | 0.029 | 0.029 | 0.000 | 0.000 |
| styrene                                                                                                                                                                                                                                                                                                                     | HC     | 0.000  | 0.000  | 0.002 | 0.002 | 0.002 | 0.002 | 0.308 | 0.170 | 0.028 | 0.016 | 0.037 | 0.014 | 0.048 | 0.032 | 0.027 | 0.009 | 0.034 | 0.012 | 0.001  | 0.056 | 0.286 | 0.205 | 0.019 | 0.017 |       |
| p-xylene                                                                                                                                                                                                                                                                                                                    | HC     | 0.000  | 0.000  | 0.013 | 0.013 | 0.000 | 0.000 | 0.161 | 0.103 | 0.085 | 0.043 | 0.157 | 0.105 | 0.084 | 0.024 | 0.060 | 0.034 | 0.049 | 0.023 | 0.009  | 0.009 | 0.032 | 0.032 | 0.005 | 0.005 |       |
| nonane                                                                                                                                                                                                                                                                                                                      | HC     | 0.000  | 0.000  | 0.030 | 0.030 | 0.075 | 0.064 | 0.000 | 0.000 | 0.020 | 0.020 | 0.154 | 0.054 | 0.004 | 0.004 | 0.035 | 0.019 | 0.000 | 0.000 | 0.000  | 0.000 | 0.000 | 0.000 | 0.000 | 0.000 |       |
| undecylated HC 1                                                                                                                                                                                                                                                                                                            | HC     | 0.000  | 0.000  | 0.012 | 0.012 | 0.002 | 0.002 | 0.112 | 0.079 | 0.068 | 0.043 | 0.148 | 0.081 | 0.058 | 0.016 | 0.058 | 0.031 | 0.049 | 0.021 | 0.014  | 0.006 | 0.032 | 0.032 | 0.003 | 0.003 |       |
| undecylated HC 2                                                                                                                                                                                                                                                                                                            | HC     | 0.008  | 0.005  | 0.010 | 0.008 | 0.007 | 0.005 | 0.043 | 0.023 | 0.013 | 0.013 | 0.054 | 0.025 | 0.013 | 0.002 | 0.039 | 0.019 | 0.025 | 0.008 | 0.013  | 0.006 | 0.011 | 0.010 | 0.003 | 0.002 |       |
| undecylated HC 3                                                                                                                                                                                                                                                                                                            | HC     | 0.001  | 0.001  | 0.014 | 0.012 | 0.002 | 0.002 | 0.117 | 0.068 | 0.042 | 0.027 | 0.047 | 0.079 | 0.060 | 0.016 | 0.068 | 0.037 | 0.043 | 0.024 | 0.018  | 0.008 | 0.057 | 0.037 | 0.037 | 0.006 | 0.006 |
| decane                                                                                                                                                                                                                                                                                                                      | HC     | 0.000  | 0.000  | 0.008 | 0.008 | 0.000 | 0.000 | 0.000 | 0.000 | 0.000 | 0.000 | 0.000 | 0.000 | 0.000 | 0.000 | 0.005 | 0.005 | 0.000 | 0.000 | 0.000  | 0.000 | 0.000 | 0.000 | 0.000 | 0.000 |       |
| 1,2,4-trimethylbenzene                                                                                                                                                                                                                                                                                                      | HC     | 0.000  | 0.000  | 0.000 | 0.000 | 0.000 | 0.000 | 0.000 | 0.000 | 0.000 | 0.000 | 0.000 | 0.000 | 0.000 | 0.000 | 0.000 | 0.000 | 0.000 | 0.000 | 0.000  | 0.000 | 0.000 | 0.000 | 0.000 | 0.000 |       |
| undecylated HC 4                                                                                                                                                                                                                                                                                                            | HC     | 0.000  | 0.000  | 0.000 | 0.000 | 0.000 | 0.000 | 0.000 | 0.000 | 0.000 | 0.000 | 0.000 | 0.000 | 0.000 | 0.000 | 0.000 | 0.000 | 0.000 | 0.000 | 0.000  | 0.000 | 0.000 | 0.000 | 0.000 | 0.000 |       |
| undecane                                                                                                                                                                                                                                                                                                                    | HC     | 0.000  | 0.000  | 0.000 | 0.000 | 0.000 | 0.000 | 0.000 | 0.000 | 0.000 | 0.000 | 0.000 | 0.000 | 0.000 | 0.000 | 0.000 | 0.000 | 0.000 | 0.000 | 0.000  | 0.000 | 0.000 | 0.000 | 0.000 | 0.000 |       |
| undecylated HC 5                                                                                                                                                                                                                                                                                                            | HC     | 0.007  | 0.004  | 0.007 | 0.005 | 0.008 | 0.004 | 0.023 | 0.009 | 0.015 | 0.009 | 0.025 | 0.009 | 0.027 | 0.003 | 0.022 | 0.010 | 0.022 | 0.007 | 0.011  | 0.007 | 0.008 | 0.008 | 0.007 | 0.003 |       |
| decadecane                                                                                                                                                                                                                                                                                                                  | HC     | 0.000  | 0.000  | 0.000 | 0.000 | 0.000 | 0.000 | 0.000 | 0.000 | 0.000 | 0.000 | 0.000 | 0.000 | 0.000 | 0.000 | 0.000 | 0.000 | 0.000 | 0.000 | 0.000  | 0.000 | 0.000 | 0.000 | 0.000 | 0.000 |       |
| undecylated HC 6                                                                                                                                                                                                                                                                                                            | HC     | 0.054  | 0.025  | 0.210 | 0.147 | 0.064 | 0.028 | 0.023 | 0.014 | 0.094 | 0.037 | 0.036 | 0.022 | 0.143 | 0.068 | 0.028 | 0.009 | 0.157 | 0.101 | 0.021  | 0.015 | 0.111 | 0.062 | 0.104 | 0.097 |       |
| undecylated HC 7                                                                                                                                                                                                                                                                                                            | HC     | 0.014  | 0.006  | 0.060 | 0.042 | 0.016 | 0.008 | 0.006 | 0.004 | 0.025 | 0.010 | 0.010 | 0.006 | 0.038 | 0.019 | 0.007 | 0.002 | 0.045 | 0.031 | 0.005  | 0.004 | 0.029 | 0.018 | 0.028 | 0.026 |       |
| tridecane                                                                                                                                                                                                                                                                                                                   | HC     | 0.000  | 0.000  | 0.000 | 0.000 | 0.000 | 0.000 | 0.000 | 0.000 | 0.000 | 0.000 | 0.000 | 0.000 | 0.000 | 0.000 | 0.000 | 0.000 | 0.000 | 0.000 | 0.000  | 0.000 | 0.000 | 0.000 | 0.000 | 0.000 |       |
| cyclohexylbenzene                                                                                                                                                                                                                                                                                                           | HC     | 0.036  | 0.036  | 0.036 | 0.026 | 0.104 | 0.044 | 0.014 | 0.010 | 0.233 | 0.233 | 0.209 | 0.207 | 0.148 | 0.158 | 0.126 | 0.016 | 0.016 | 0.011 | 0.011  | 0.000 | 0.000 | 0.000 | 0.000 | 0.000 |       |
| tetradecane                                                                                                                                                                                                                                                                                                                 | HC     | 0.000  | 0.000  | 0.008 | 0.006 | 0.028 | 0.003 | 0.003 | 0.005 | 0.005 | 0.005 | 0.009 | 0.009 | 0.004 | 0.004 | 0.013 | 0.013 | 0.000 | 0.000 | 0.000  | 0.000 | 0.000 | 0.000 | 0.000 | 0.000 |       |
| pentadecane                                                                                                                                                                                                                                                                                                                 | HC     | 0.000  | 0.000  | 0.024 | 0.017 | 0.042 | 0.036 | 0.000 | 0.000 | 0.000 | 0.000 | 0.046 | 0.046 | 0.000 | 0.000 | 0.011 | 0.011 | 0.059 | 0.059 | 0.002  | 0.002 | 0.004 | 0.004 | 0.000 | 0.000 |       |
| hexadecane                                                                                                                                                                                                                                                                                                                  | HC     | 0.050  | 0.050  | 0.054 | 0.021 | 0.001 | 0.001 | 0.000 | 0.000 | 0.000 | 0.000 | 0.162 | 0.162 | 0.192 | 0.098 | 0.098 | 0.066 | 0.024 | 0.024 | 0.000  | 0.000 | 0.000 | 0.000 | 0.000 | 0.000 |       |
| isoprene                                                                                                                                                                                                                                                                                                                    | ISO    | 33.875 | 33.092 | 0.583 | 0.425 | 0.328 | 0.173 | 8.139 | 5.658 | 1.179 | 0.654 | 0.386 | 2.969 | 1.770 | 1.469 | 0.309 | 0.257 | 0.008 | 0.413 | 2.902  | 2.002 | 0.656 | 3.338 | 3.208 | 2.735 |       |
| (E)-4,8-dimethylnona-1,3,7-triene (DMNT)                                                                                                                                                                                                                                                                                    | MT     | 0.136  | 0.113  | 0.061 | 0.039 | 0.162 | 0.089 | 0.776 | 0.500 | 0.262 | 0.185 | 0.308 | 0.201 | 0.049 | 0.023 | 2.458 | 2.390 | 0.470 | 0.865 | 0.604  | 0.066 | 0.069 | 0.070 | 0.070 | 0.070 |       |
| α-pinene                                                                                                                                                                                                                                                                                                                    | MT     | 0.063  | 0.050  | 0.200 | 0.150 | 0.074 | 0.045 | 0.225 | 0.083 | 0.111 | 0.061 | 0.216 | 0.122 | 0.310 | 0.094 | 0.185 | 0.080 | 0.248 | 0.132 | 0.114  | 0.073 | 0.252 | 0.173 | 0.073 |       |       |
| α-terpinene                                                                                                                                                                                                                                                                                                                 | MT     | 1.033  | 0.929  | 0.071 | 0.042 | 0.045 | 0.015 | 0.073 | 0.096 | 0.026 | 0.043 | 0.092 | 0.043 | 0.052 | 0.012 | 0.246 | 0.169 | 0.098 | 0.056 | 0.239  | 0.183 | 0.099 | 0.054 | 0.062 | 0.031 |       |
| β-terpinene                                                                                                                                                                                                                                                                                                                 | MT     | 1.704  | 0.950  | 2.678 | 2.542 | 0.135 | 0.049 | 1.445 | 0.816 | 0.526 | 0.133 | 0.183 | 0.075 | 0.694 | 0.357 | 0.326 | 0.105 | 0.410 | 0.218 | 0.268  | 0.133 | 0.670 | 0.401 | 1.342 | 1.274 |       |
| α-myrcene                                                                                                                                                                                                                                                                                                                   | MT     | 0.103  | 0.044  | 0.259 | 0.134 | 0.033 | 0.011 | 0.170 | 0.067 | 0.136 | 0.063 | 0.048 | 0.032 | 0.056 | 0.019 | 0.091 | 0.060 | 0.083 | 0.059 | 0.108  | 0.067 | 0.156 | 0.074 | 0.090 | 0.068 |       |
| α-phellandrene                                                                                                                                                                                                                                                                                                              | MT     | 0.007  | 0.003  | 0.007 | 0.005 | 0.004 | 0.001 | 0.013 | 0.004 | 0.010 | 0.004 | 0.007 | 0.003 | 0.007 | 0.002 | 0.013 | 0.008 | 0.008 | 0.005 | 0.011  | 0.005 | 0.006 | 0.003 | 0.001 |       |       |
| γ-carene                                                                                                                                                                                                                                                                                                                    | MT     | 0.000  | 0.000  | 0.047 | 0.047 | 0.000 | 0.000 | 0.091 | 0.055 | 0.039 | 0.036 | 0.038 | 0.033 | 0.082 | 0.031 | 0.059 | 0.035 | 0.051 | 0.025 | 0.000  | 0.000 | 0.023 | 0.023 | 0.000 | 0.000 |       |
| α-cymene                                                                                                                                                                                                                                                                                                                    | MT     | 0.041  | 0.020  | 0.026 | 0.015 | 0.010 | 0.006 | 0.056 | 0.014 | 0.048 | 0.004 | 0.055 | 0.039 | 0.024 | 0.008 | 0.057 | 0.031 | 0.045 | 0.021 | 0.075  | 0.051 | 0.027 | 0.014 | 0.027 | 0.013 |       |
| d-limonene                                                                                                                                                                                                                                                                                                                  | MT     | 0.067  | 0.024  | 0.120 | 0.066 | 0.026 | 0.009 | 0.111 | 0.057 | 0.187 | 0.084 | 0.048 | 0.029 | 0.072 | 0.022 | 0.083 | 0.040 | 0.058 | 0.021 | 0.080  | 0.054 | 0.118 | 0.040 | 0.066 | 0.042 |       |
| trans-α-ocimene                                                                                                                                                                                                                                                                                                             | MT     | 0.264  | 0.047  | 0.272 | 0.134 | 0.410 | 0.171 | 1.151 | 0.438 | 0.500 | 0.075 | 0.680 | 0.309 | 0.236 | 0.069 | 0.589 | 0.423 | 0.672 | 0.473 | 0.864  | 0.328 | 0.145 | 0.055 | 0.387 | 0.201 |       |
| undecylated MT 1                                                                                                                                                                                                                                                                                                            | MT     | 0.117  | 0.051  | 0.065 | 0.045 | 0.098 | 0.061 | 0.508 | 0.258 | 0.127 | 0.184 | 0.119 | 0.032 | 0.015 | 0.559 | 0.534 | 0.382 | 0.359 | 0.784 | 0.313  | 0.034 | 0.018 | 0.056 | 0.020 |       |       |
| γ-terpinene                                                                                                                                                                                                                                                                                                                 | MT     | 0.040  | 0.017  | 0.069 | 0.039 | 0.034 | 0.022 | 0.140 | 0.061 | 0.025 | 0.003 | 0.050 | 0.032 | 0.025 | 0.010 | 0.148 | 0.121 | 0.053 | 0.020 | 0.179  | 0.152 | 0.023 | 0.012 | 0.052 | 0.031 |       |
| undecylated MT 2                                                                                                                                                                                                                                                                                                            | MT     | 0.002  | 0.001  | 0.003 | 0.001 | 0.002 | 0.001 | 0.004 | 0.001 | 0.003 | 0.001 | 0.004 | 0.002 | 0.004 | 0.001 | 0.004 | 0.002 | 0.003 | 0.001 | 0.004  | 0.002 | 0.001 | 0.001 | 0.002 | 0.001 |       |
| α-terpinene                                                                                                                                                                                                                                                                                                                 | MT     | 0.019  | 0.010  | 0.032 | 0.020 | 0.012 | 0.004 | 0.045 | 0.014 | 0.105 | 0.081 | 0.026 | 0.012 | 0.029 | 0.008 | 0.035 | 0.024 | 0.031 | 0.017 | 0.039  | 0.018 | 0.014 | 0.010 | 0.010 |       |       |
| allo-ocimene                                                                                                                                                                                                                                                                                                                | MT     | 0.007  | 0.003  | 0.007 | 0.004 | 0.007 | 0.004 | 0.046 | 0.019 | 0.018 | 0.009 | 0.020 | 0.009 | 0.008 | 0.001 | 0.056 | 0.053 | 0.029 | 0.065 | 0.024  | 0.003 | 0.003 | 0.004 | 0.002 |       |       |
